# Supplementary material for: Anti-Inflammatory Oleanolic Triterpenes from Chinese Acorns
Source: PubMed Central journal article supplement (PMC6272836; doi:10.3390/molecules21050669), 2016-05-20
Supplement: molecules-21-00669-s001.pdf [file molecules-21-00669-s001.pdf]

# Supplementary Materials: Anti-Inflammatory Oleanolic Triterpenes from Chinese Acorns

Jie Huang, Yihai Wang, Chuan Li, Xinluan Wang and Xiangjiu He

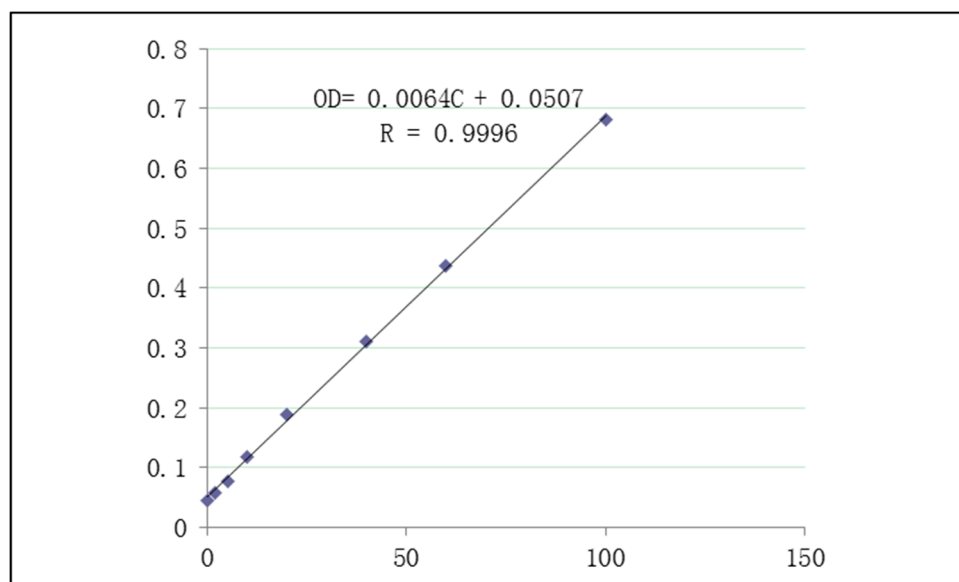

**Figure S1.** The Standard Curve of the NO Assay. C: the concentrations of NaNO<sub>2</sub> (μM); OD: the absorbance value.

The standard curve of NO assay were tested by the Nitric oxide kits. NO concentration was photometrically quantified for the amounts of stable product nitrite produced in the cell using the nitrate reduction method. So the X axis means the concentrations of NaNO<sub>2</sub> (μM), the Y axis means the absorbance values. IC<sub>50</sub> values were the OD values of each compounds calculated according to the standard curve of NO with a calculation software CalcuSyn.

NO inhibition rate = (OD value average of model control group – OD value average of the sample group)/(OD value average of model control group – OD value average of negative control group) × 100%

## The Results of the MTT Assay

**Table S1.** The Average OD Values of Compounds 1–11.

| Compound      | OD of 100 μM | OD of 50 μM | OD of 25 μM |
|---------------|--------------|-------------|-------------|
| Control group | 2.50         | 2.36        | 2.21        |
| 1             | 2.27         | 2.44        | 2.40        |
| 2             | 2.26         | 2.43        | 2.32        |
| 3             | 2.53         | 2.33        | 2.34        |
| 4             | 2.04         | 2.28        | 2.35        |
| 5             | 2.35         | 2.43        | 2.50        |
| 6             | 2.18         | 2.40        | 2.27        |
| 7             | 2.27         | 2.34        | 2.50        |
| 8             | 2.40         | 2.29        | 2.19        |
| 9             | 1.97         | 2.27        | 2.18        |
| 10            | 2.40         | 2.29        | 2.25        |
| 11            | 2.24         | 2.34        | 2.00        |

OD: the average absorbance value.

**Table S2.** The Inhibition Ratios of Compounds.

| Compound | 100 $\mu$ M(%) | 50 $\mu$ M(%) | 25 $\mu$ M(%) |
|----------|----------------|---------------|---------------|
| 1        | 9.20           | -3.39         | -8.60         |
| 2        | 9.60           | -2.97         | -4.98         |
| 3        | -1.20          | 1.27          | -5.88         |
| 4        | 18.40          | 3.39          | -6.33         |
| 5        | 6.00           | -2.97         | -13.12        |
| 6        | 12.80          | -1.69         | -2.71         |
| 7        | 9.20           | 0.85          | -13.12        |
| 8        | 4.00           | 2.97          | 0.90          |
| 9        | 21.20          | 3.81          | 1.36          |
| 10       | 4.00           | 2.97          | -1.81         |
| 11       | 10.40          | 0.85          | 9.50          |

From Table S1, we can see the average OD values of compounds 1–11, and the data were calculated by three parallel groups of every concentration of each compound.

From Table S2, the inhibition ratios were resulted from the following formula:

The inhibition ratios = [(OD of control group) – (OD of each compound)]/(OD of control group)  $\times$  100%

And from the results we can see, all the inhibition ratios were less than 50%, which means compounds 1–11 exhibited no cytotoxicity against the tested cells (RAW 264.7 macrophage cells).

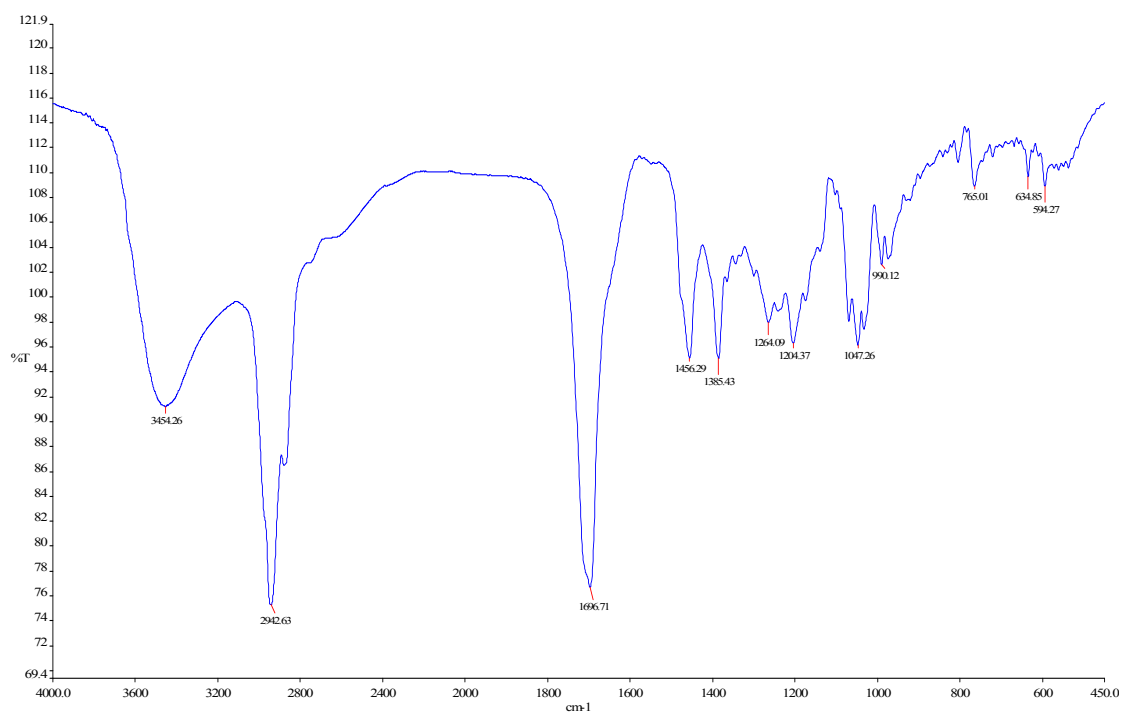**Figure S2.** IR of compound 1.

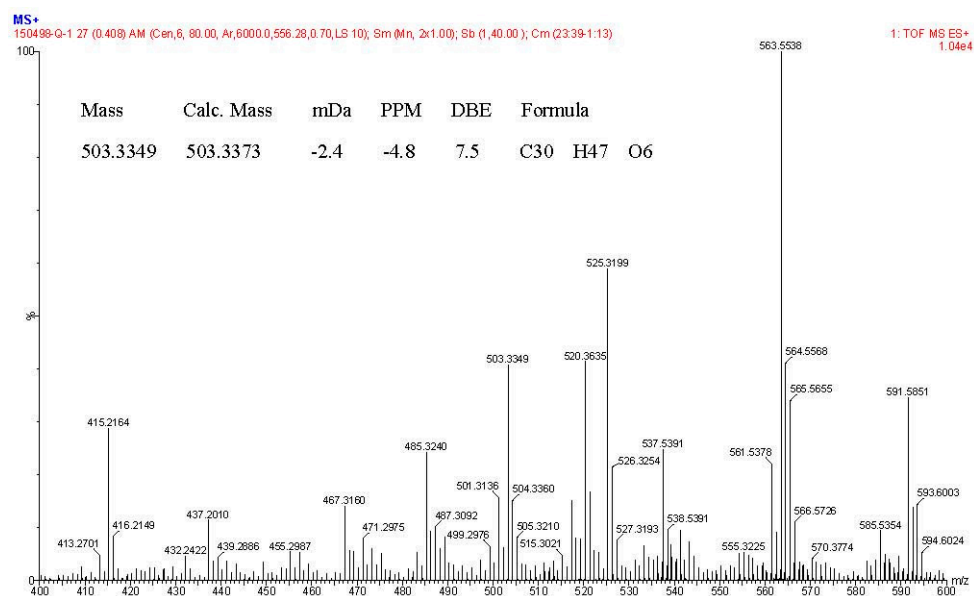

Figure S3. HR-ESI-MS of Compound 1.

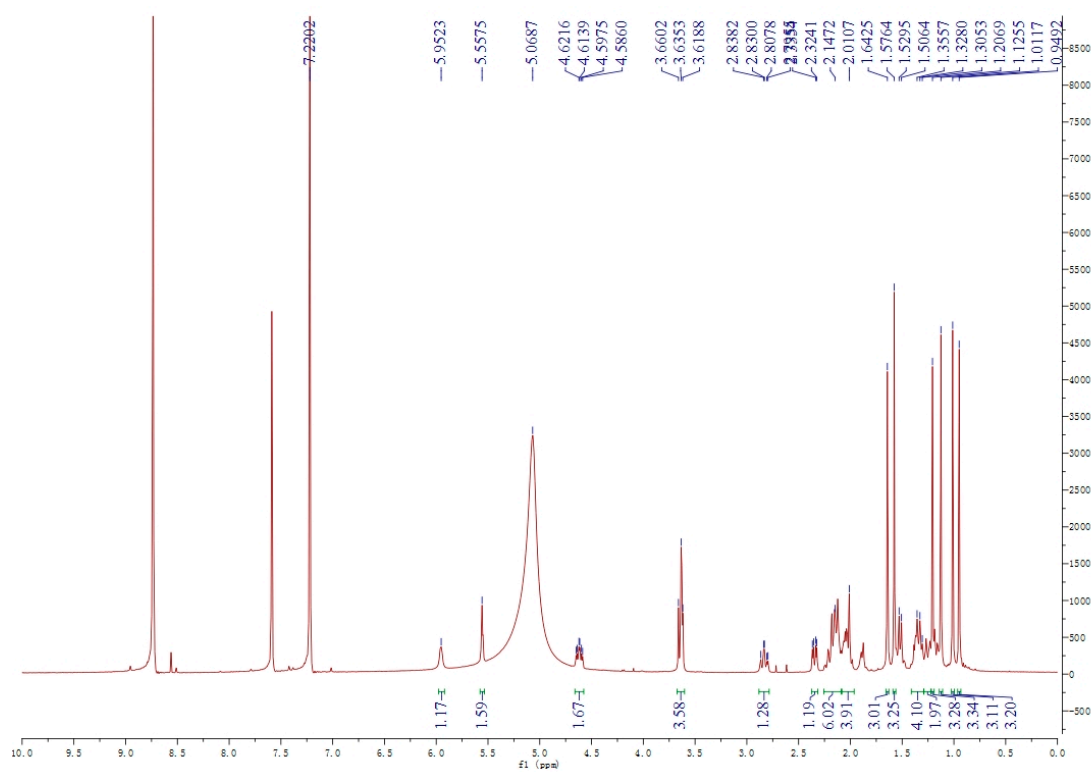Figure S4. <sup>1</sup>H-NMR of Compound 1 (500 MHz, C<sub>5</sub>D<sub>5</sub>N).

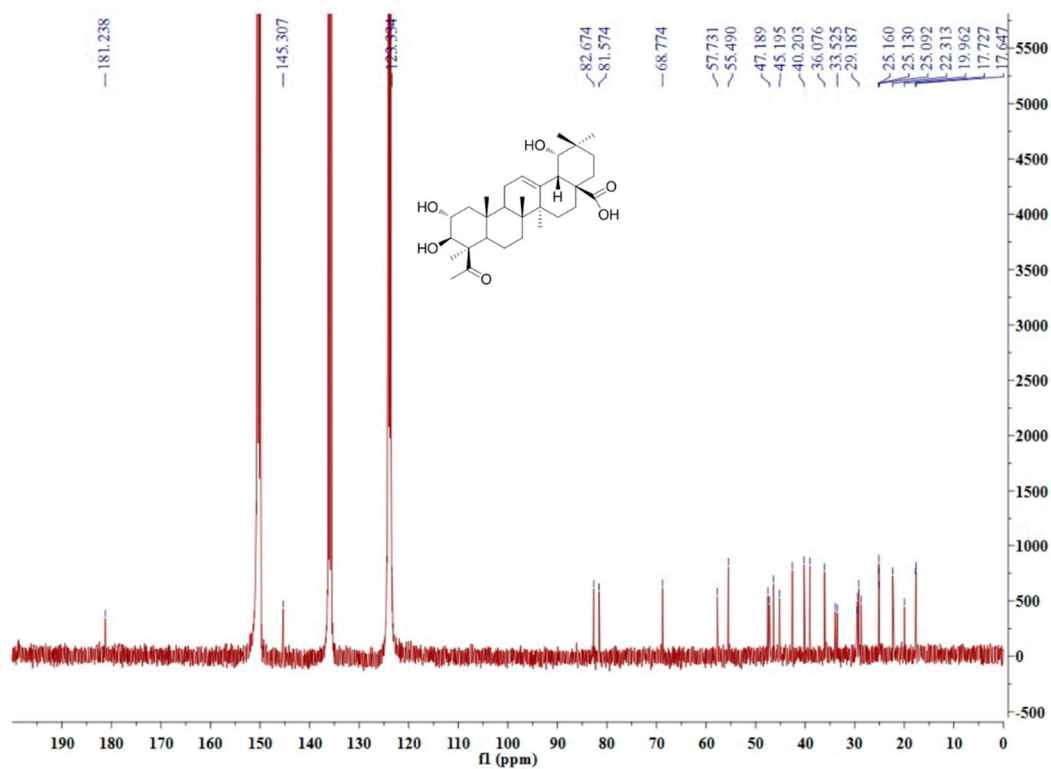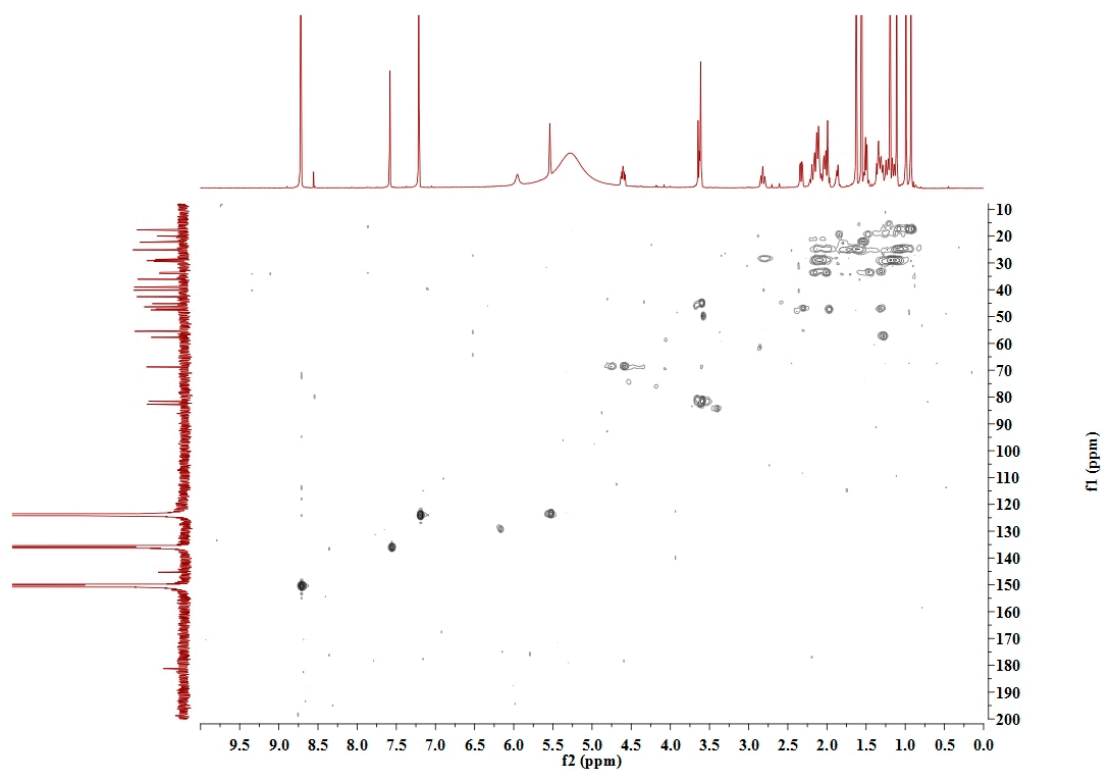

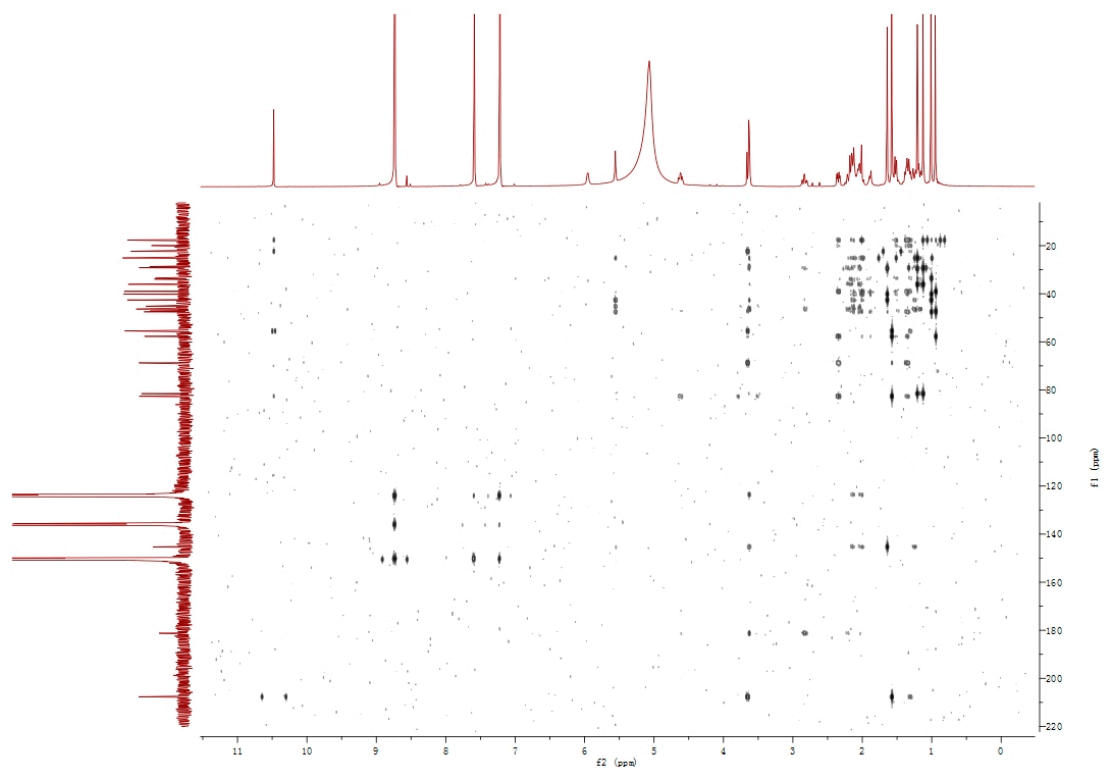

Figure S7. HMBC of Compound 1.

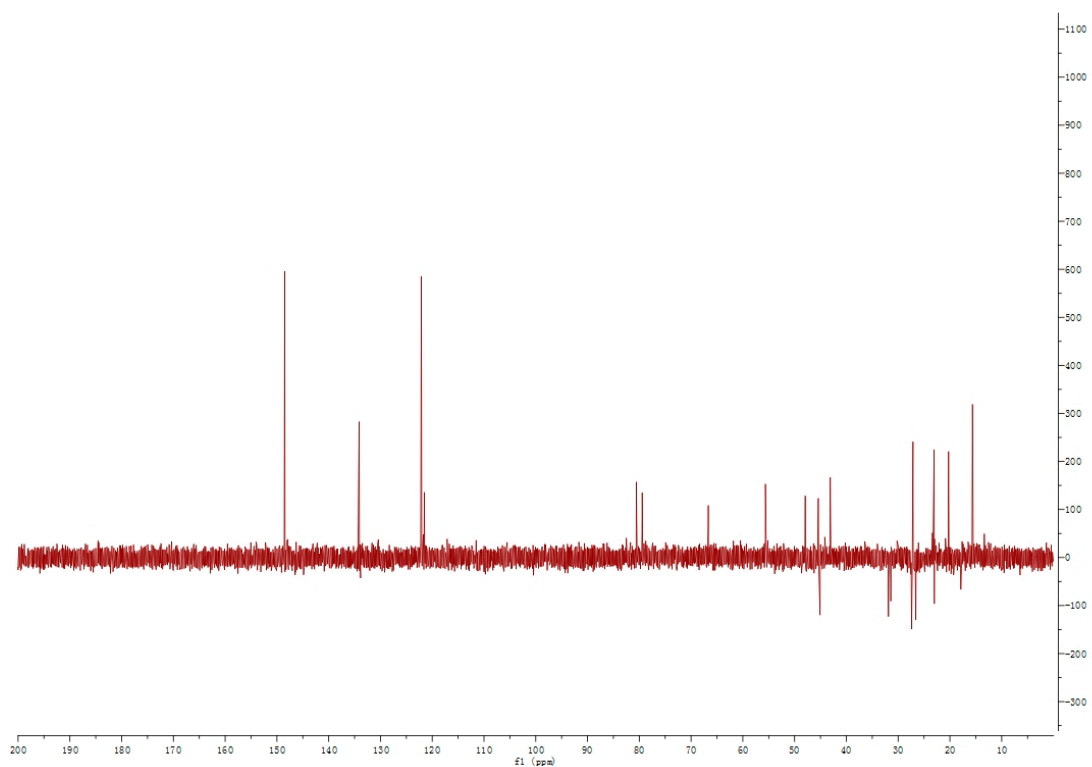

Figure S8. DEPT 135° of Compound 1.

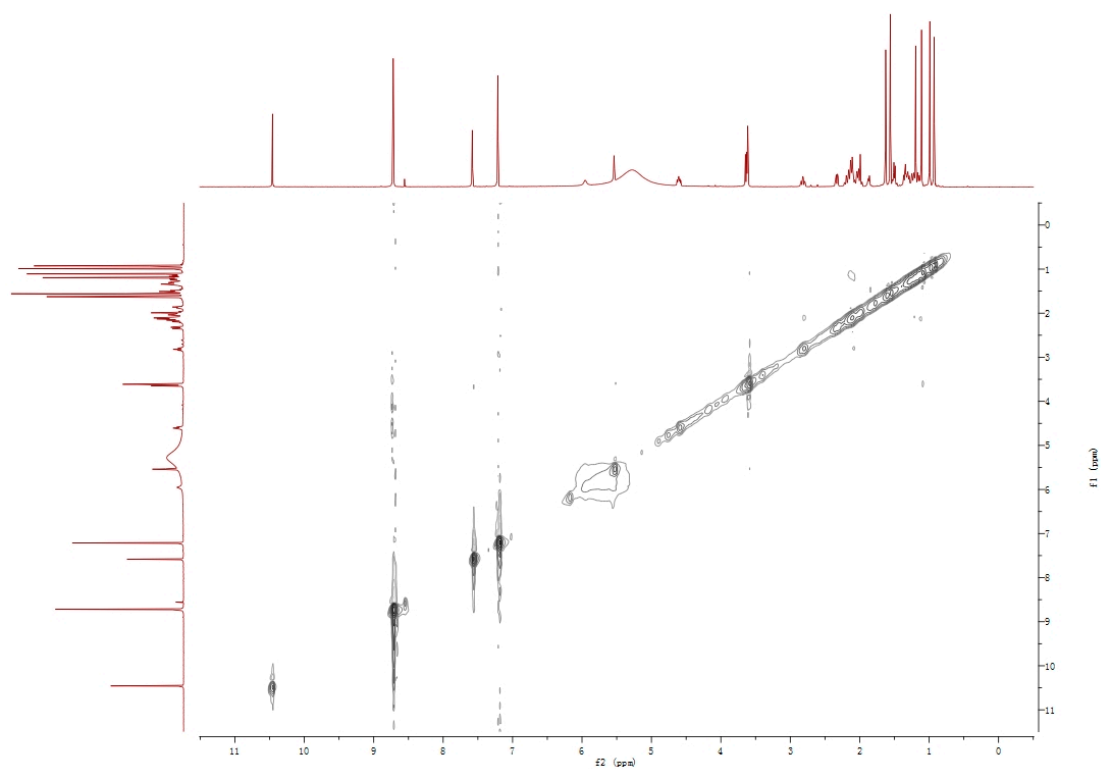

Figure S9. NOESY of Compound 1.

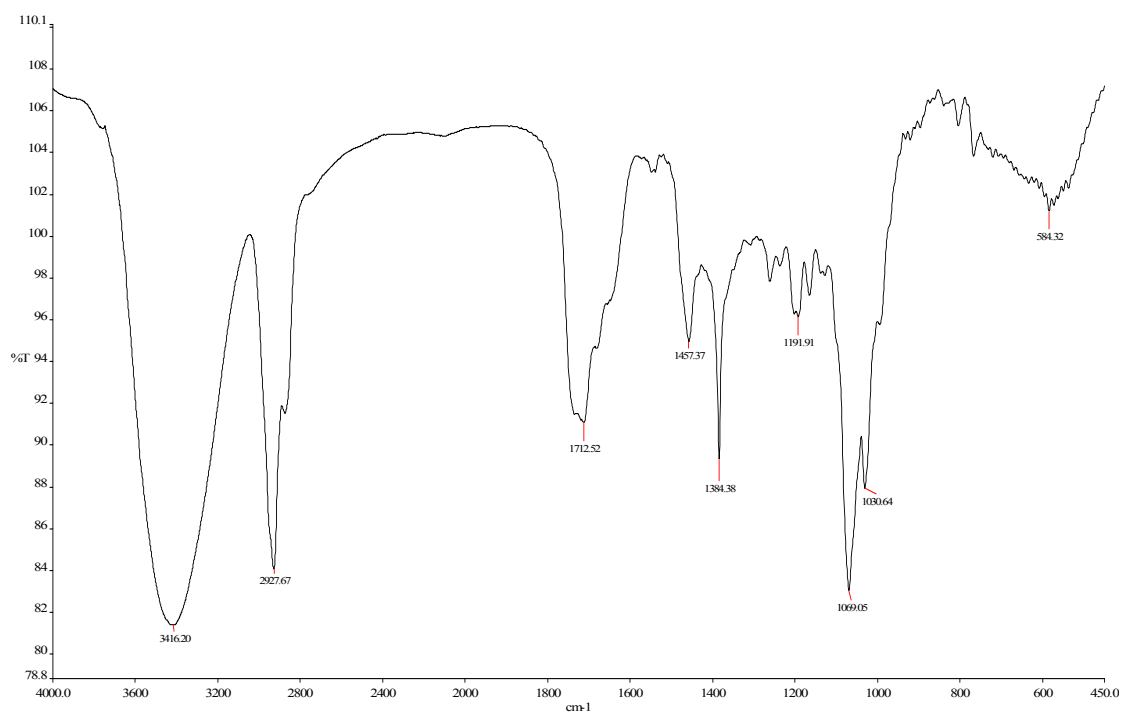

Figure S10. IR of Compound 2.

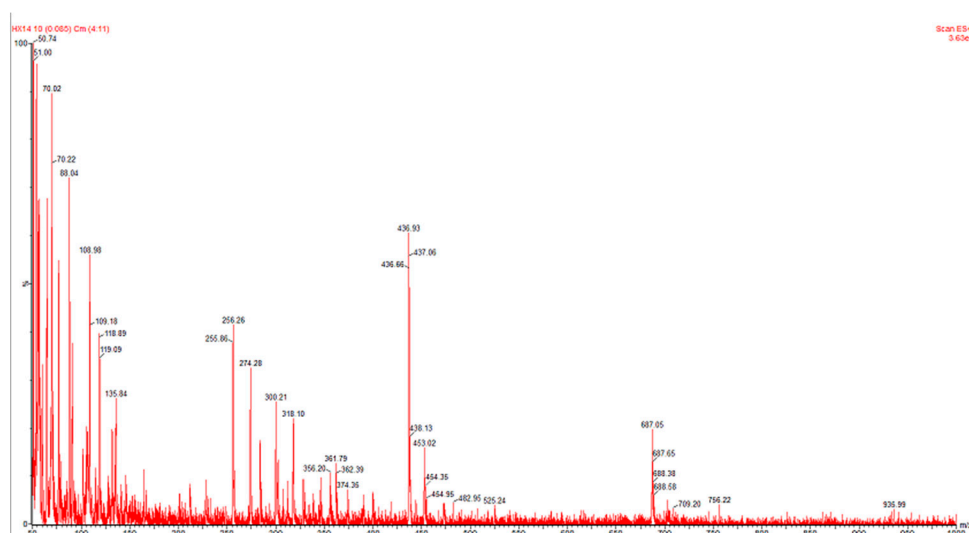

Figure S11. ES-MS of Compound 2.

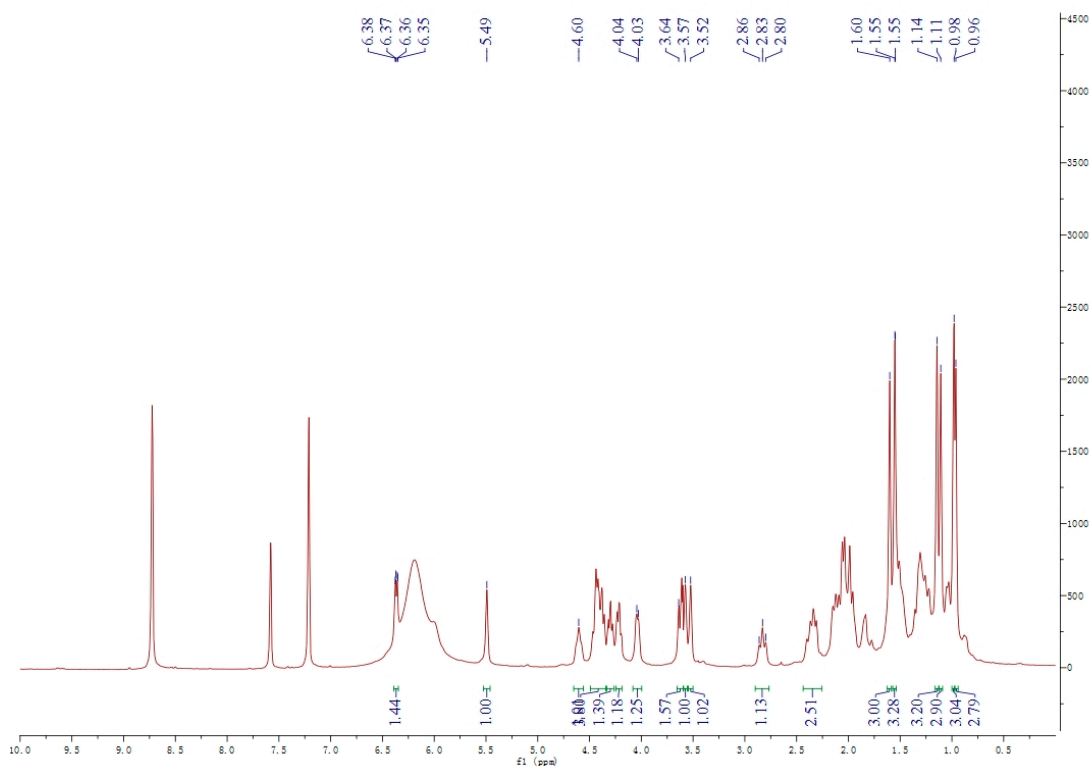Figure S12. <sup>1</sup>H-NMR of Compound 2 (500 MHz, C<sub>5</sub>D<sub>5</sub>N).

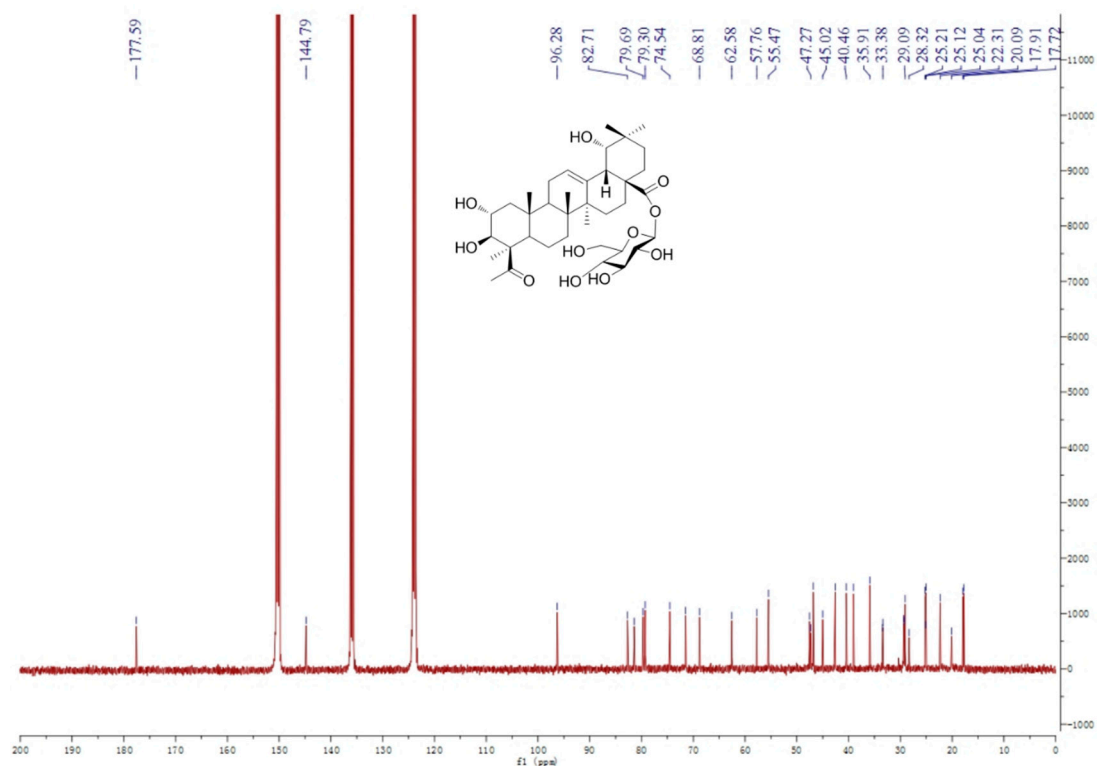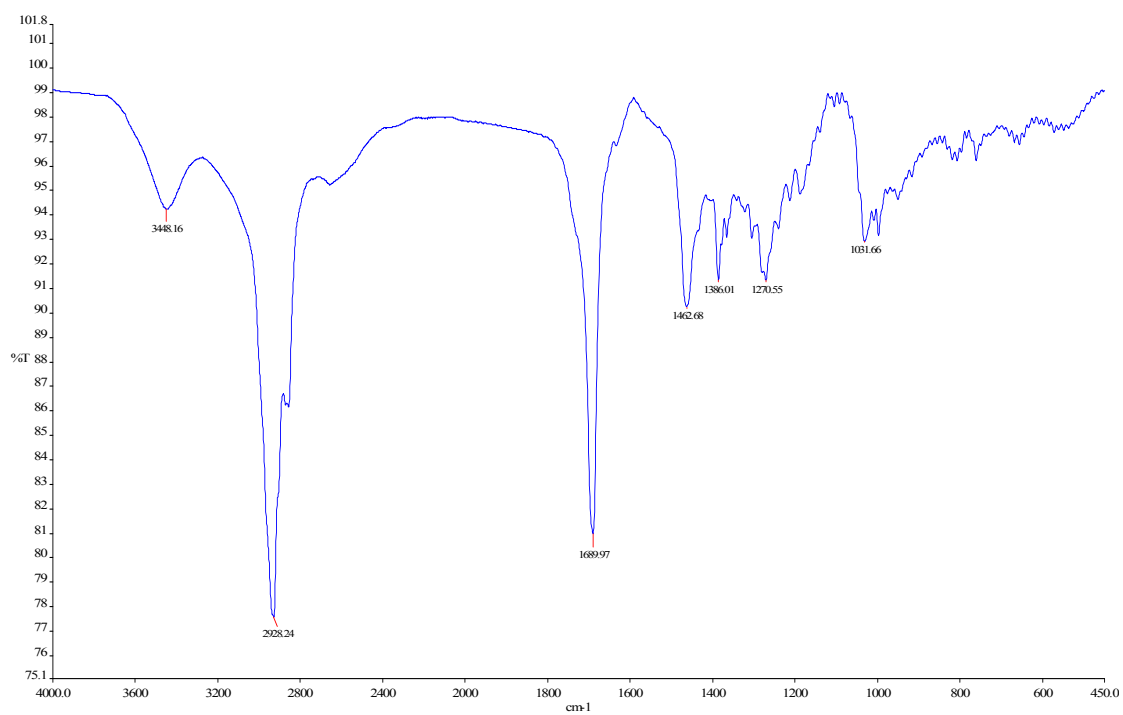



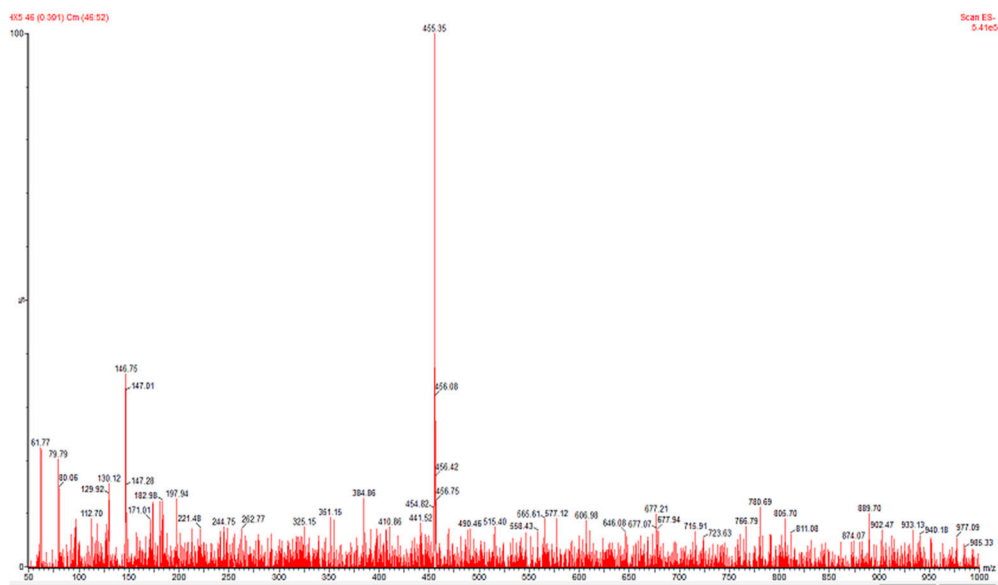

Figure S15. ES-MS of Compound 3.

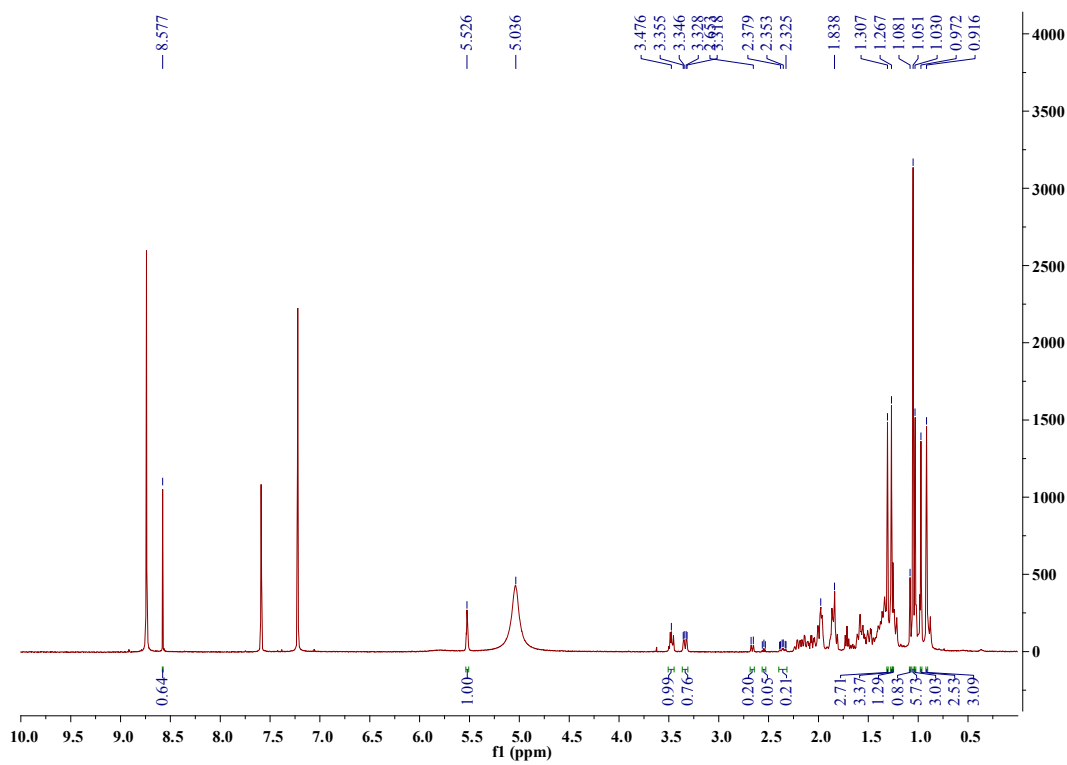Figure S16. <sup>1</sup>H-NMR of Compound 3 (500 MHz, C<sub>5</sub>D<sub>5</sub>N).

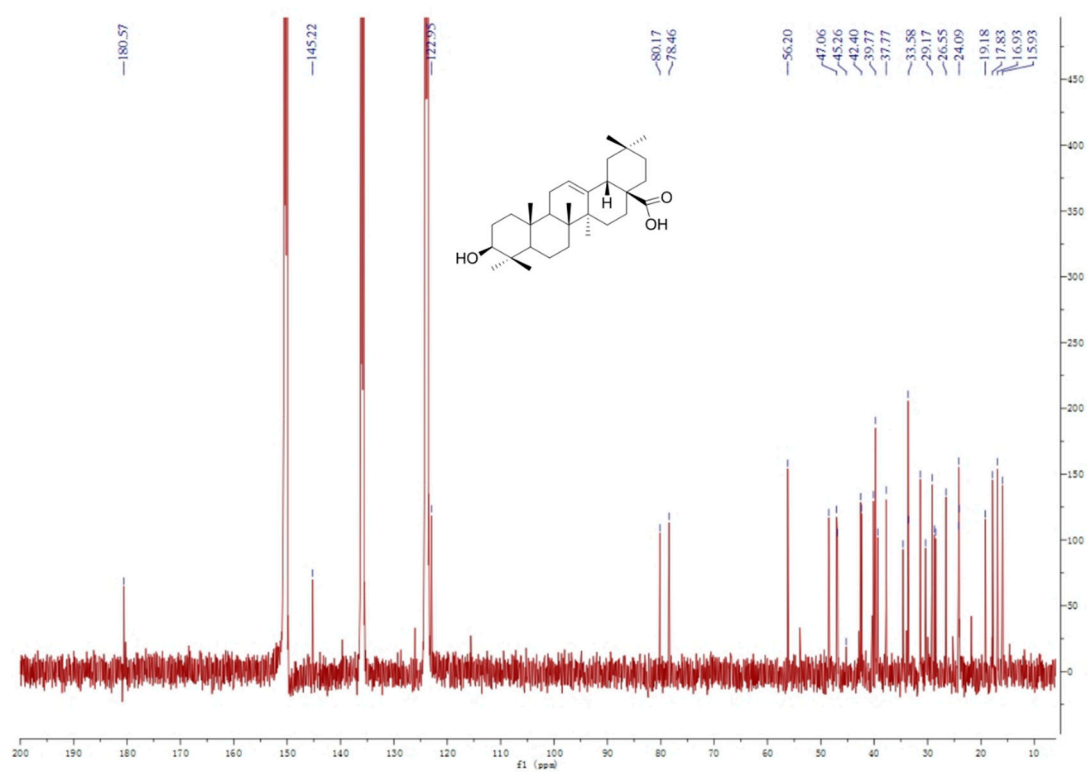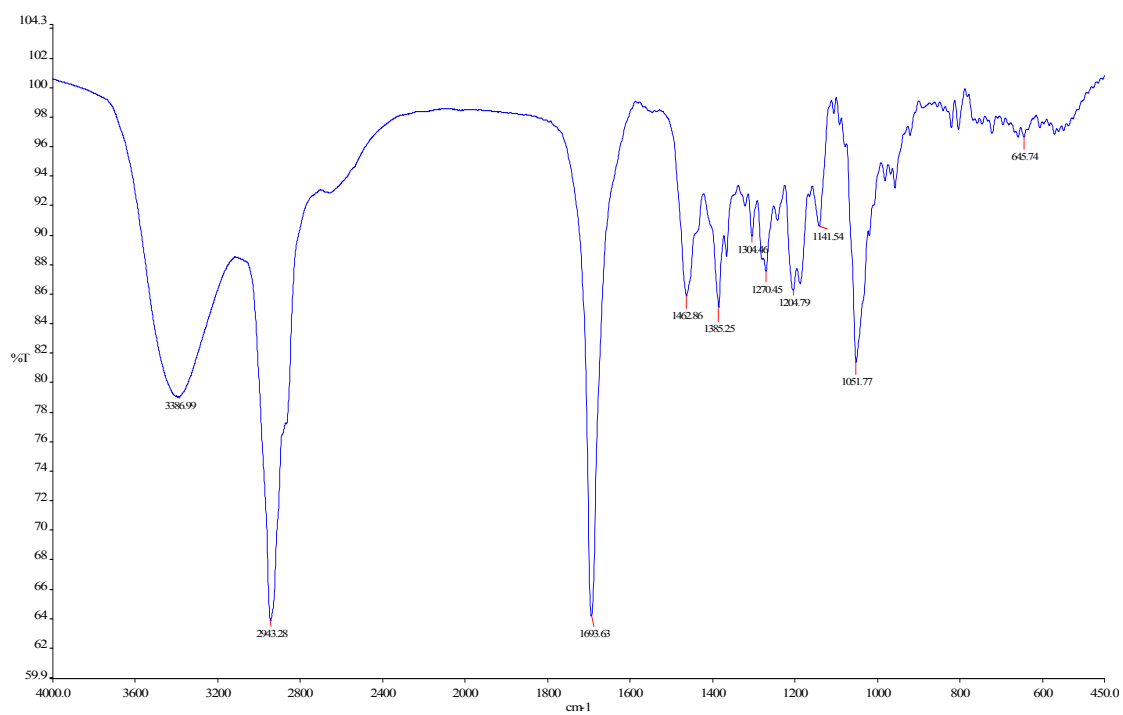

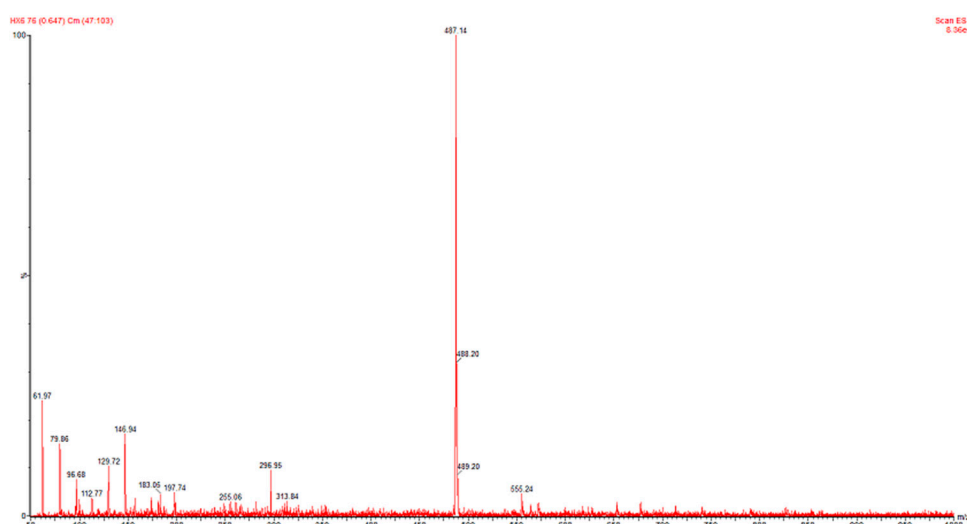

Figure S19. ES-MS of Compound 4.

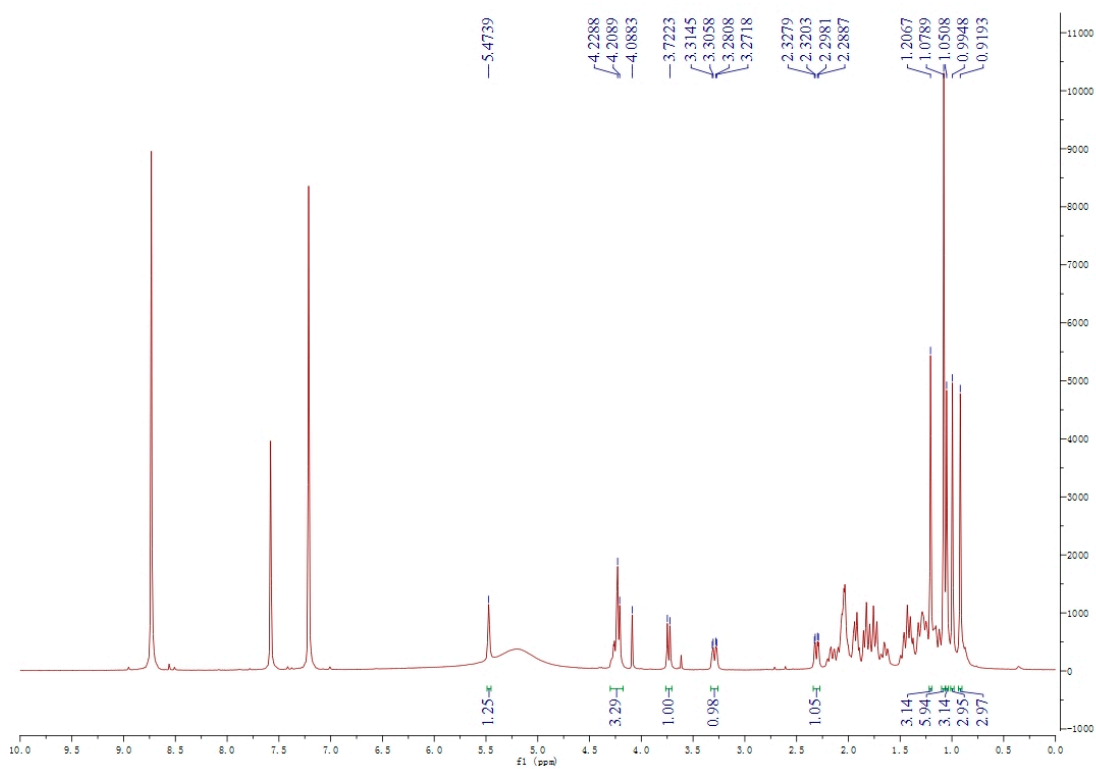Figure S20. <sup>1</sup>H-NMR of Compound 4 (500 MHz, C<sub>5</sub>D<sub>5</sub>N).

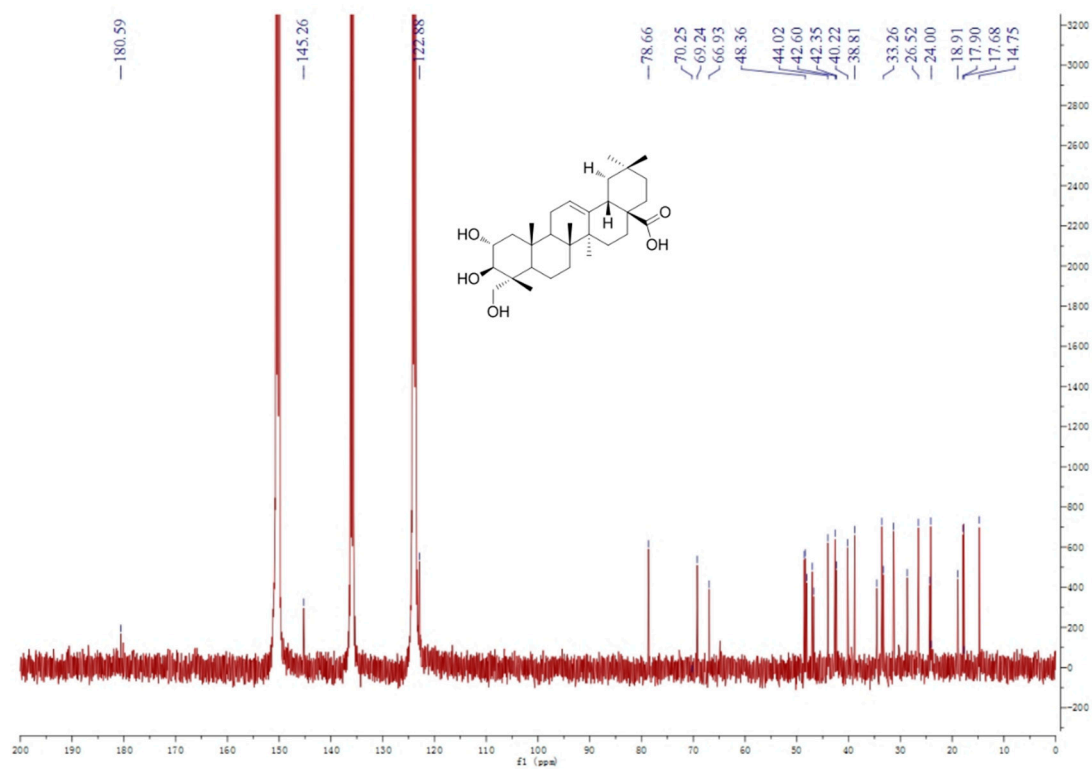

Figure S21.  $^{13}\text{C}$ -NMR of Compound 4 (126 MHz,  $\text{C}_5\text{D}_5\text{N}$ ).

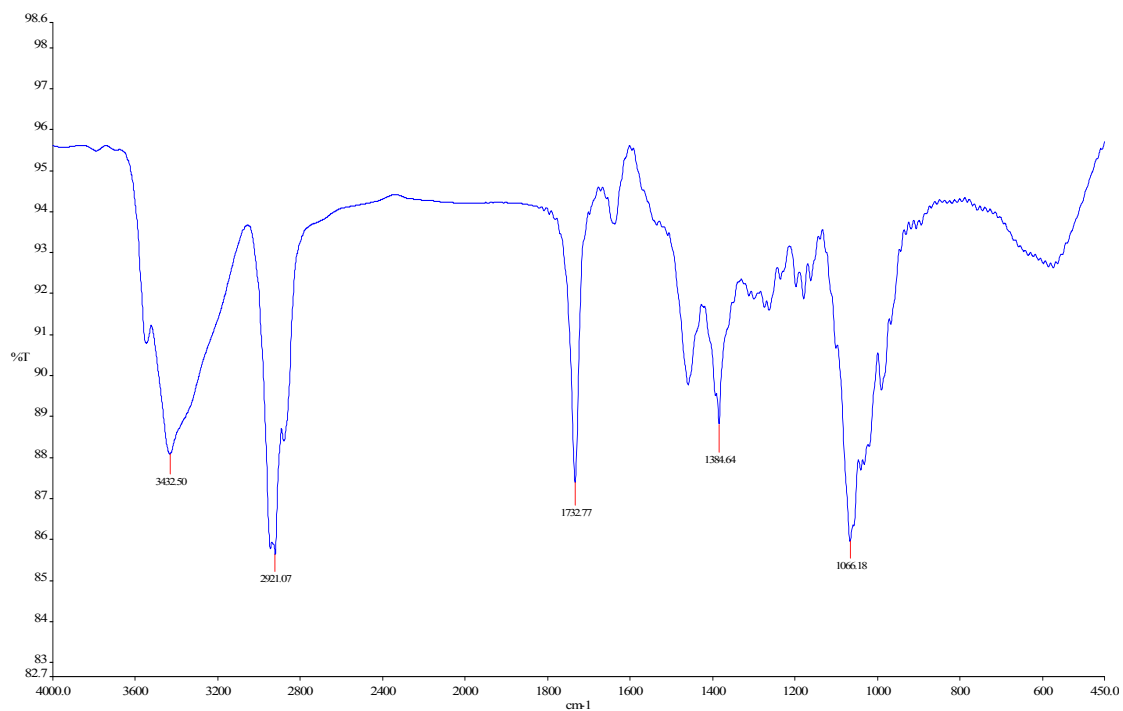

Figure S22. IR of Compound 5.

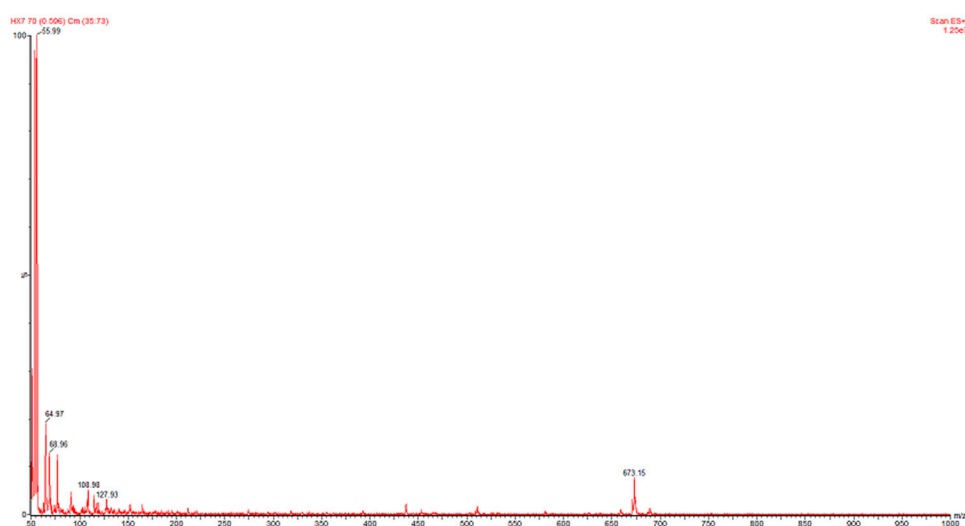

Figure S23. ES-MS of Compound 5.

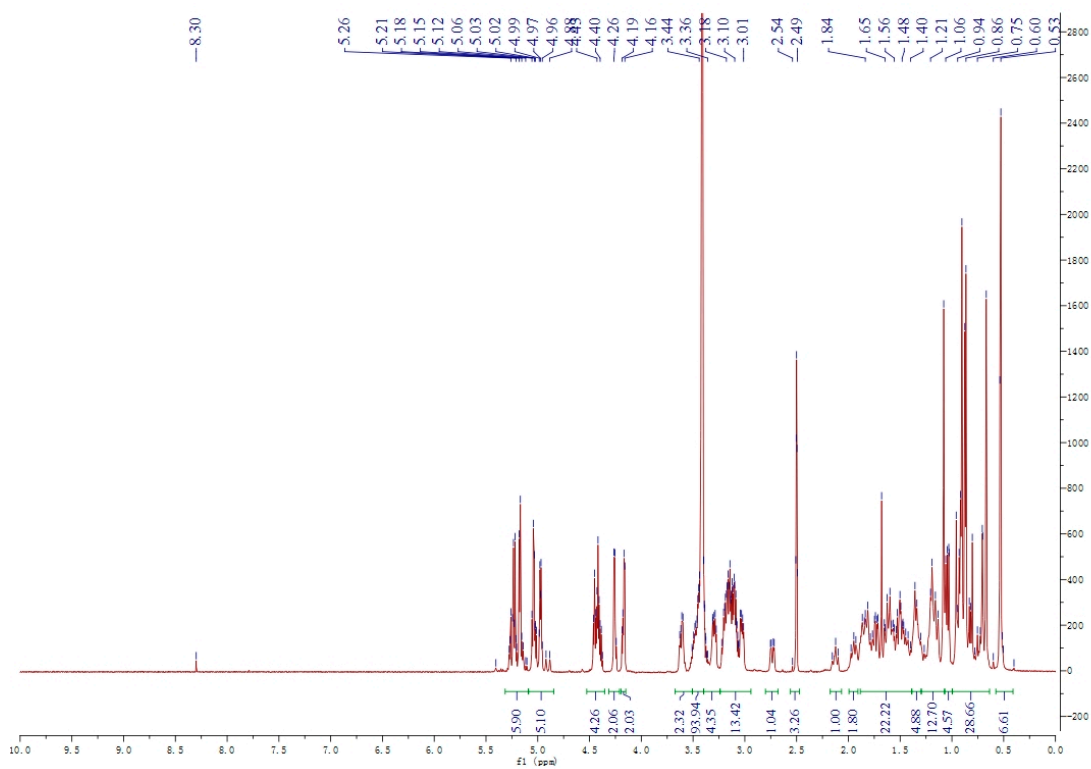Figure S24.  $^1\text{H-NMR}$  of Compound 5 (500 MHz, DMSO).

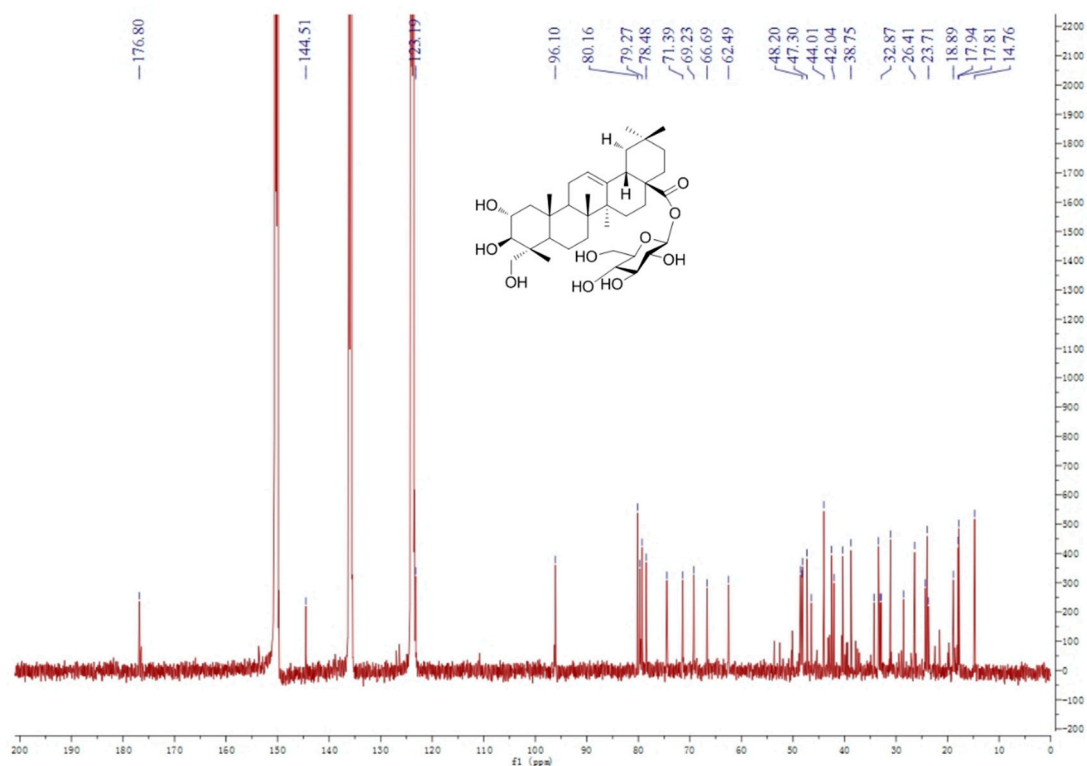

Figure S25.  $^{13}\text{C}$ -NMR of Compound 5 (126 MHz, DMSO).

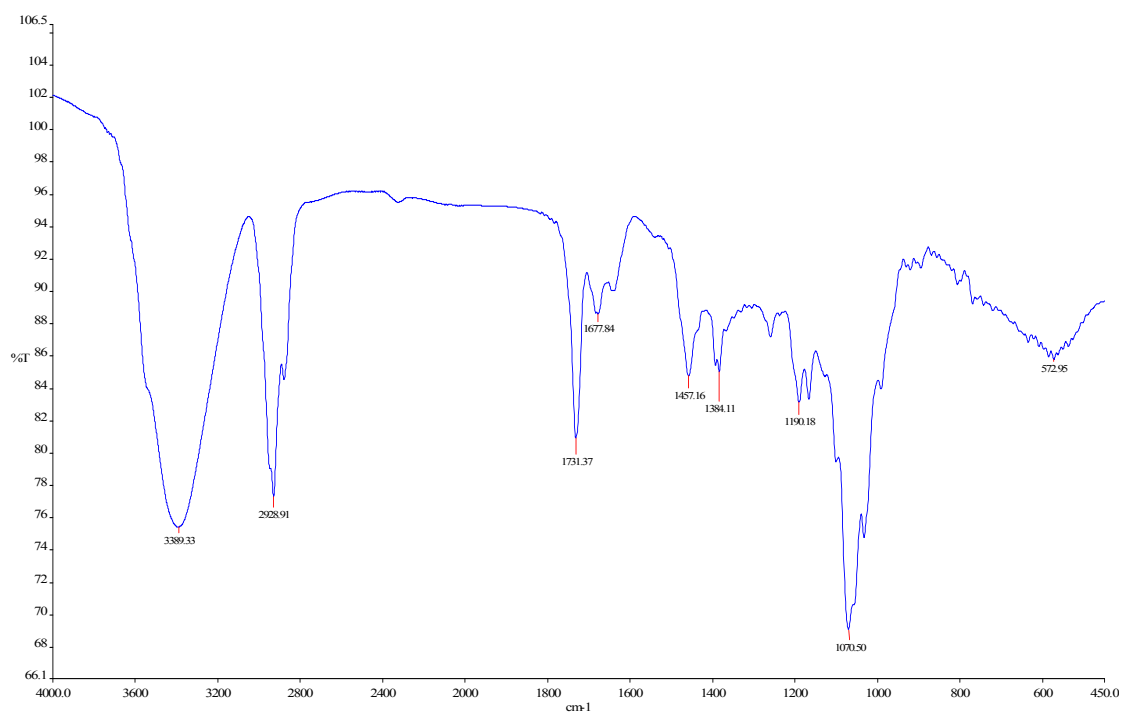

Figure S26. IR of Compound 6.

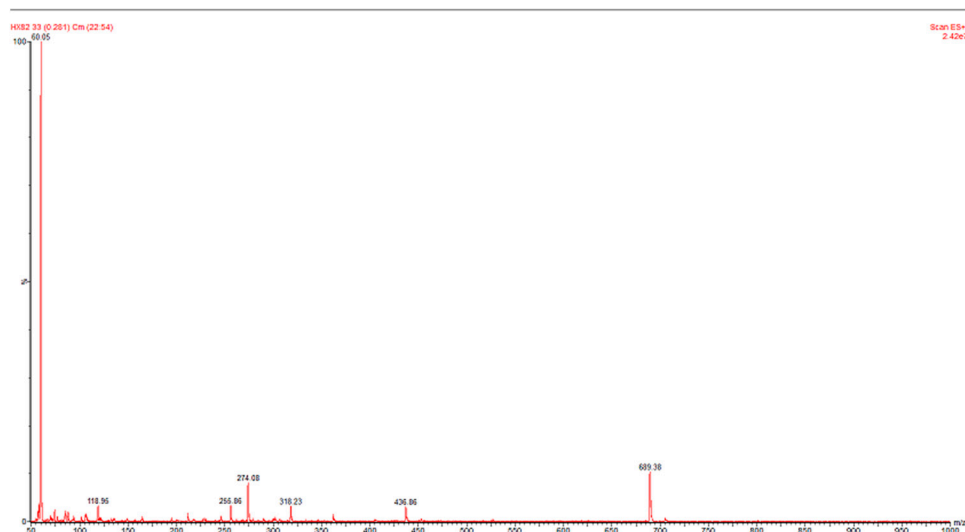

Figure S27. ES-MS of Compound 6.

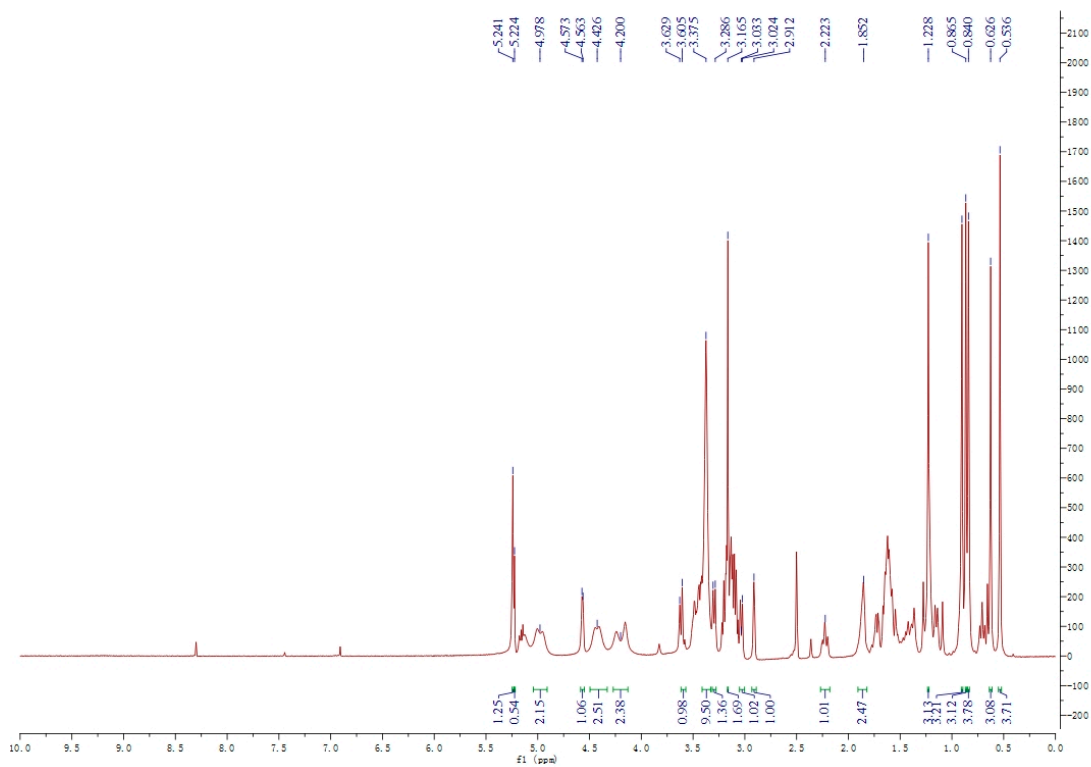Figure S28. <sup>1</sup>H-NMR of Compound 6 (500 MHz, DMSO).

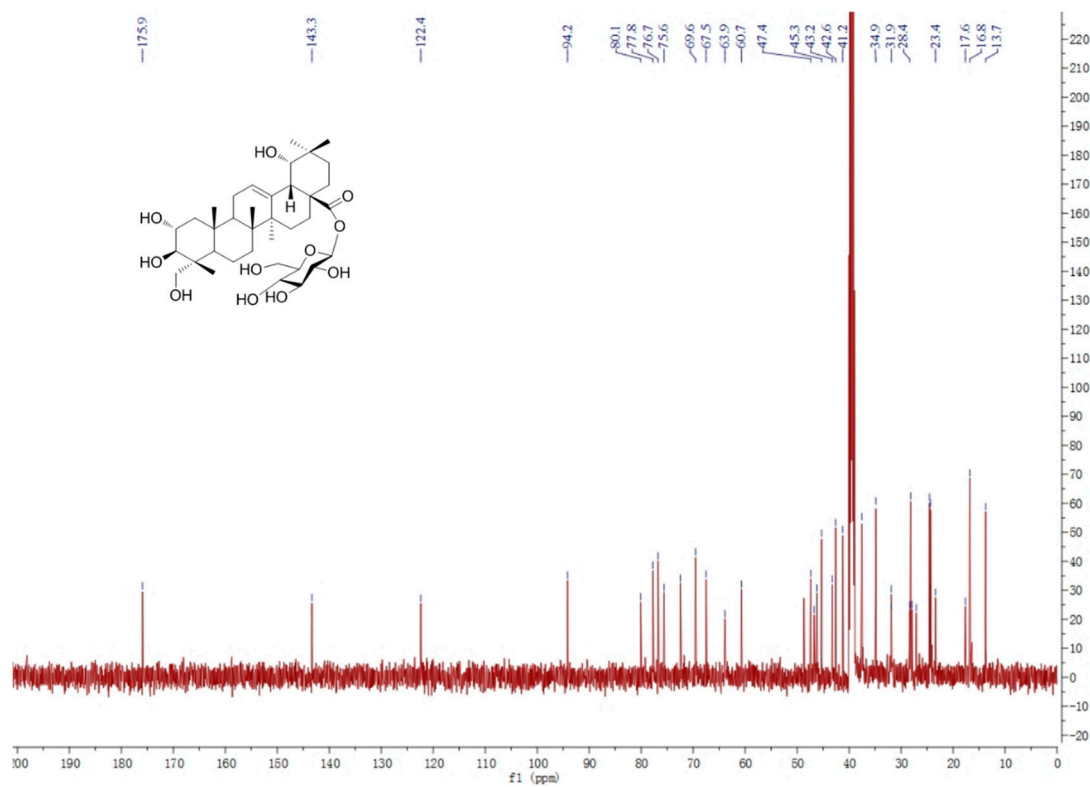

Figure S29.  $^{13}\text{C-NMR}$  of Compound 6 (126 MHz, DMSO).

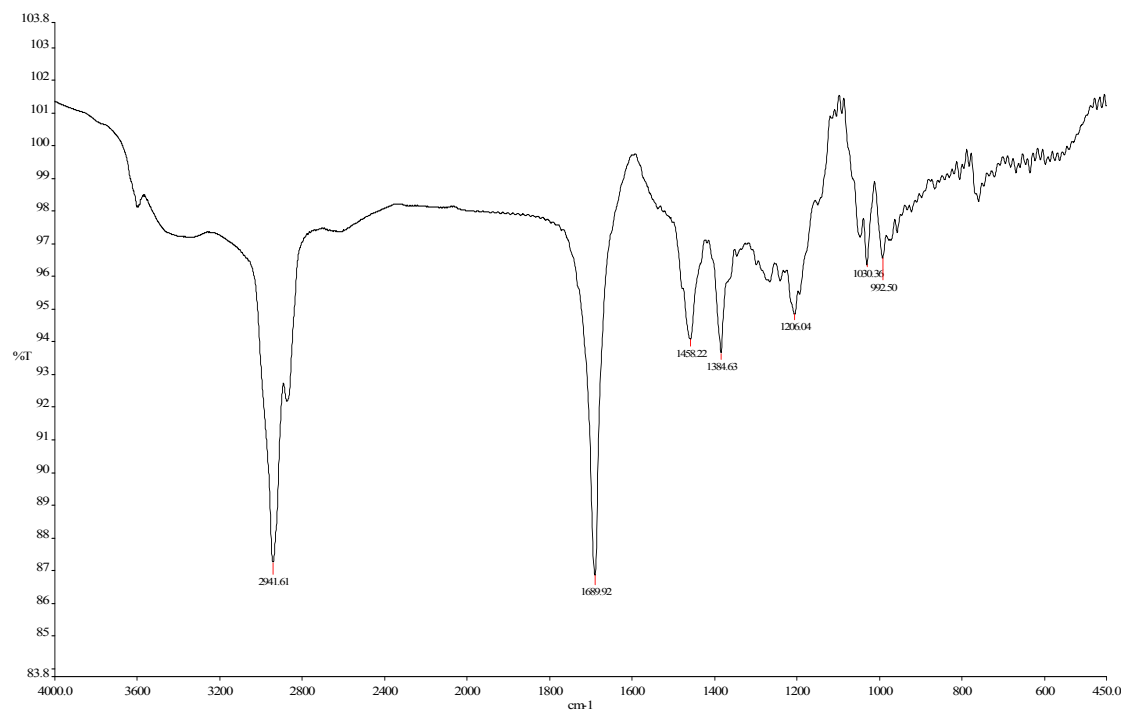

Figure S30. IR of Compound 7.



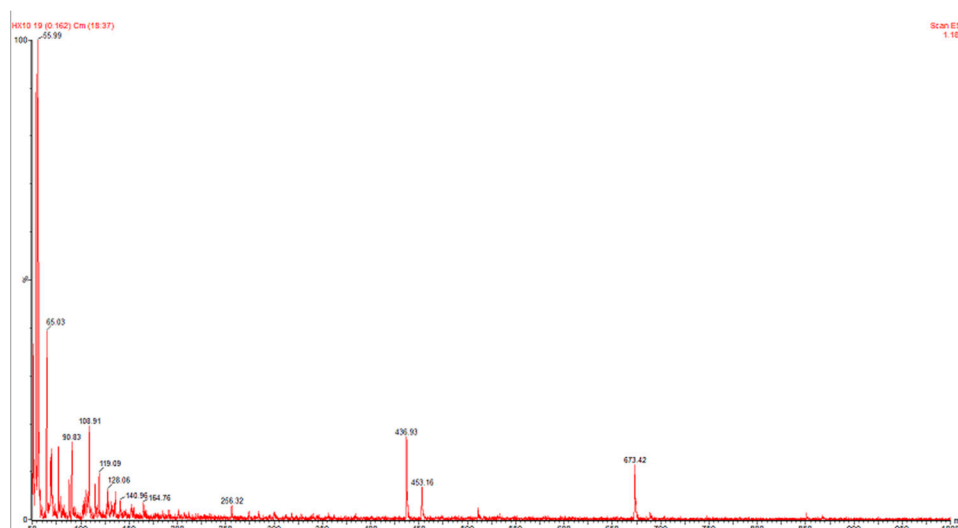

Figure S31. ES-MS of Compound 7.

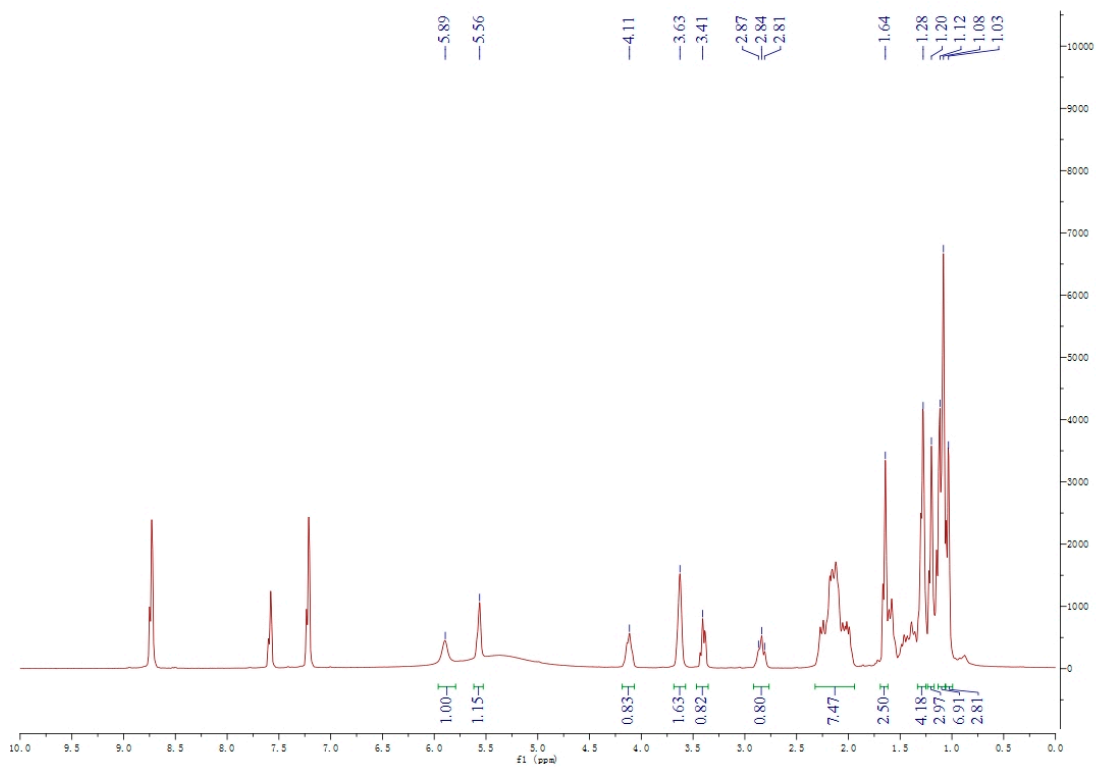Figure S32.  $^1\text{H-NMR}$  of Compound 7 (400 MHz,  $\text{C}_5\text{D}_5\text{N}$ ).

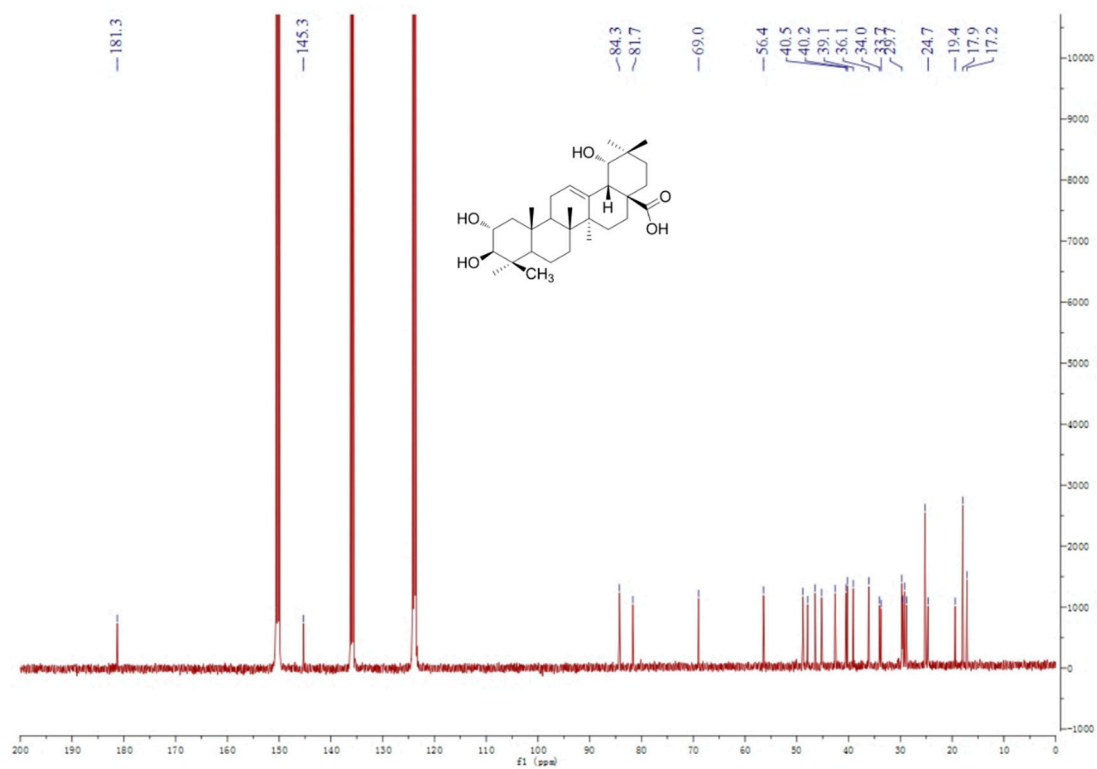

Figure S33.  $^{13}\text{C}$ -NMR of Compound 7 (101 MHz,  $\text{C}_5\text{D}_5\text{N}$ ).

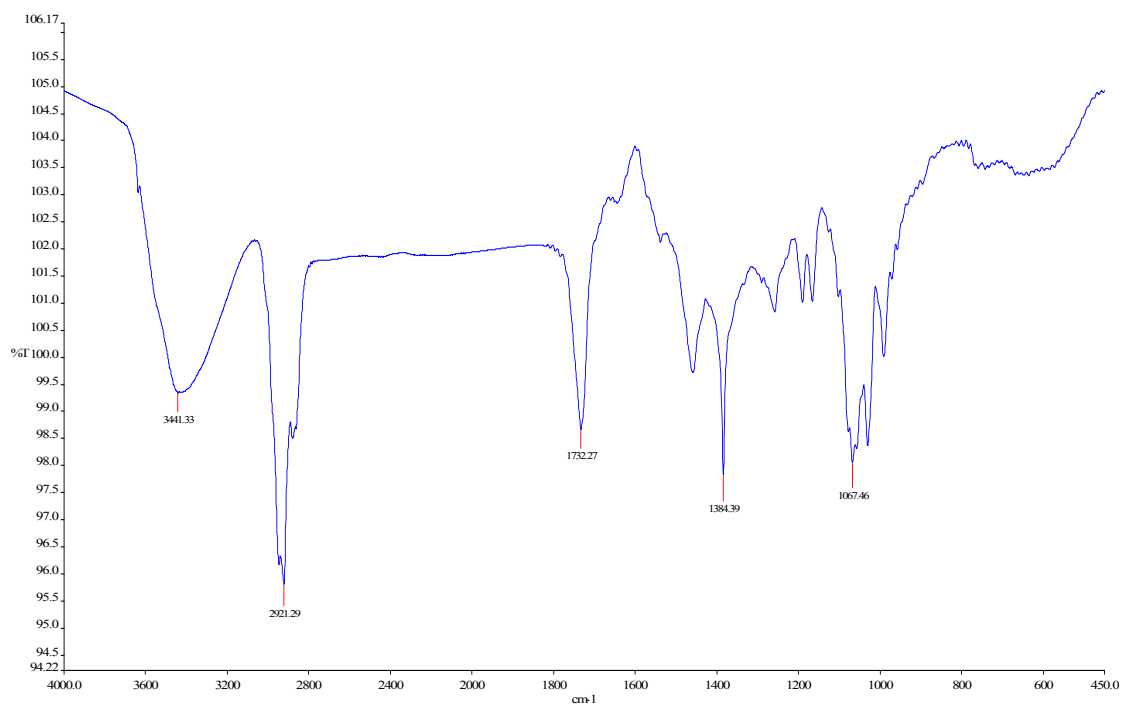

Figure S34. IR of Compound 8.



Figure S35. ES-MS of Compound 8.

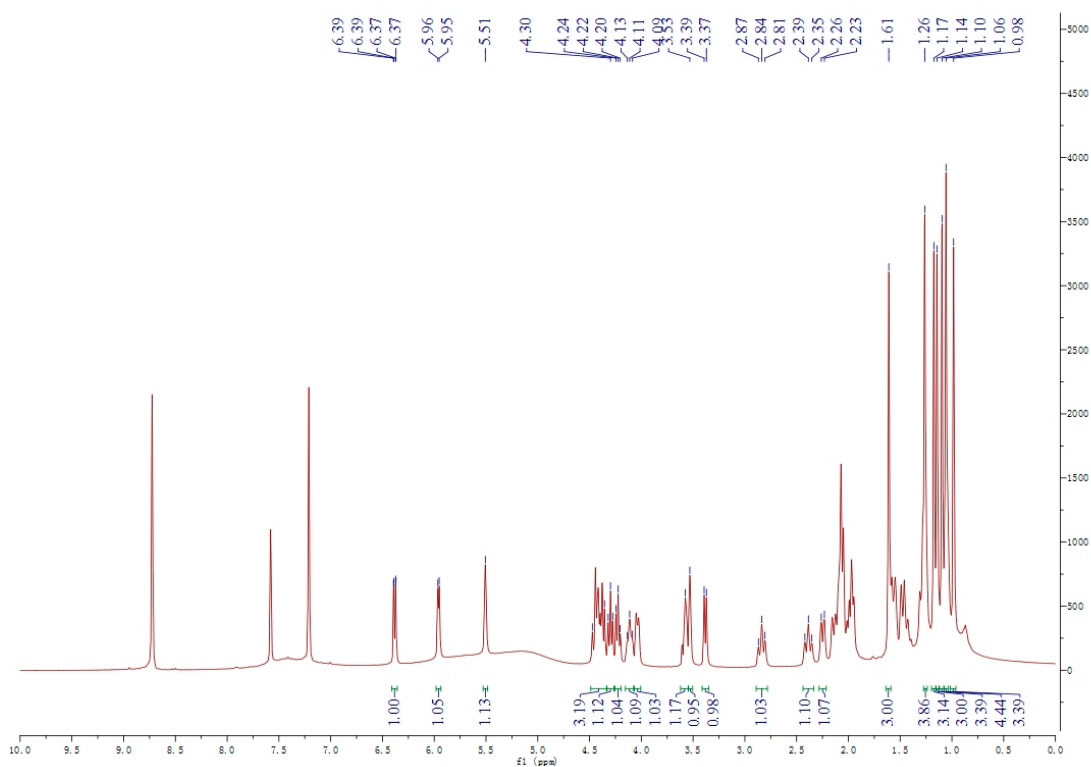Figure S36. <sup>1</sup>H-NMR of Compound 8 (500 MHz, C<sub>5</sub>D<sub>5</sub>N).

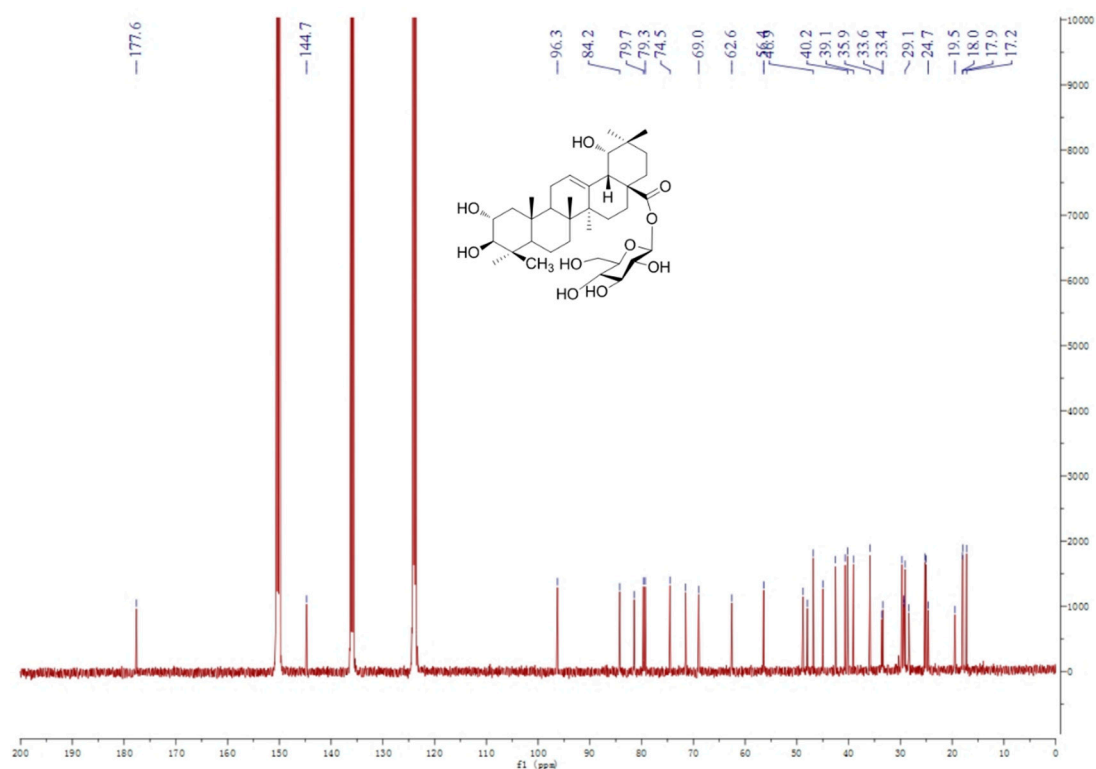

Figure S37.  $^{13}\text{C}$ -NMR of Compound 8 (126 MHz,  $\text{C}_5\text{D}_5\text{N}$ ).

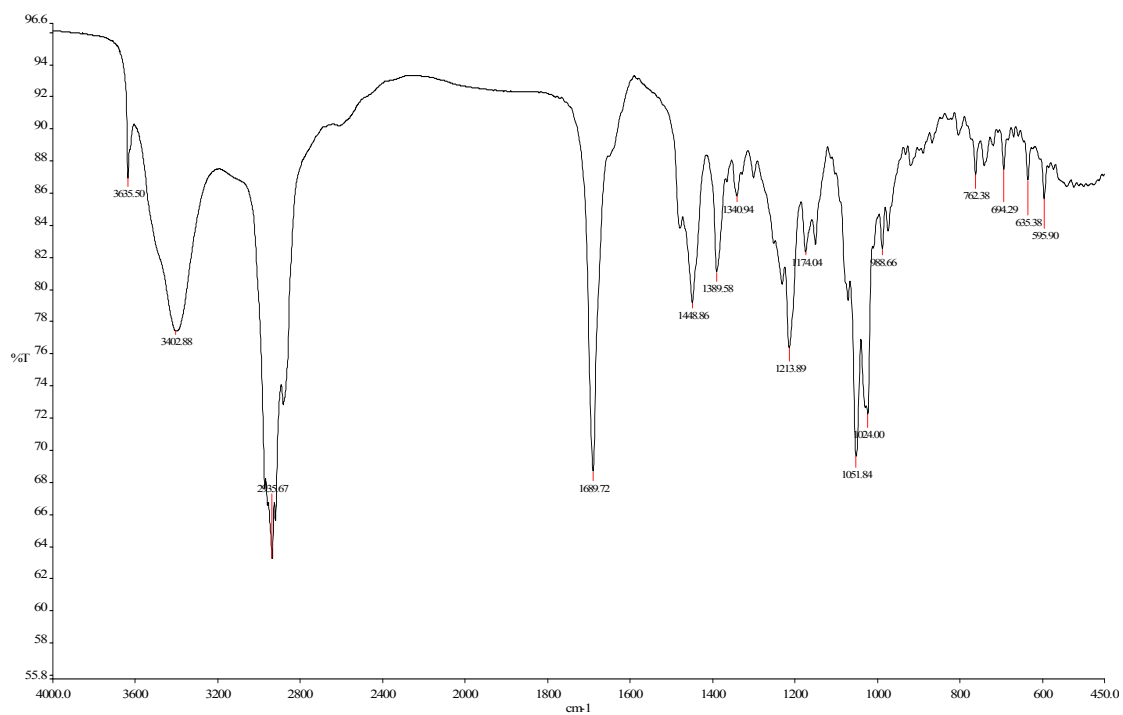

Figure S38. IR of Compound 9.

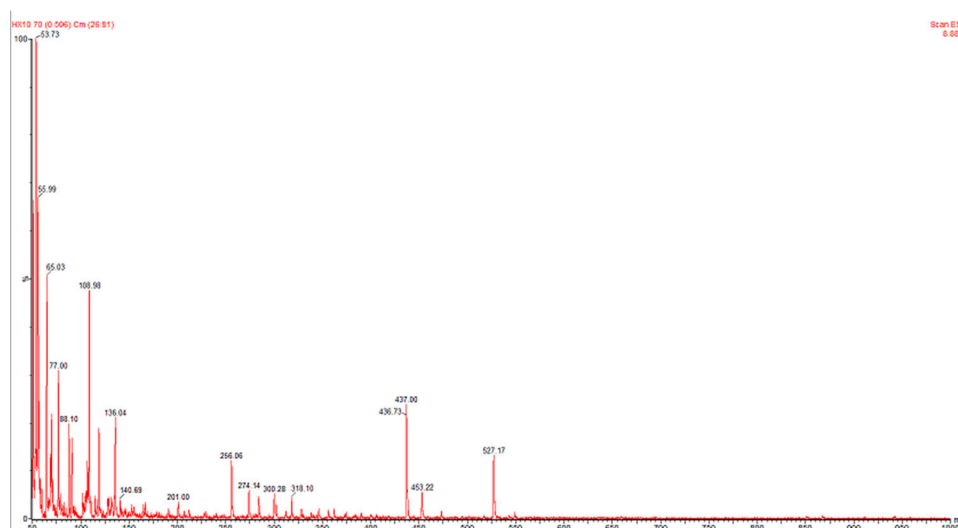

Figure S39. ES-MS of Compound 9.

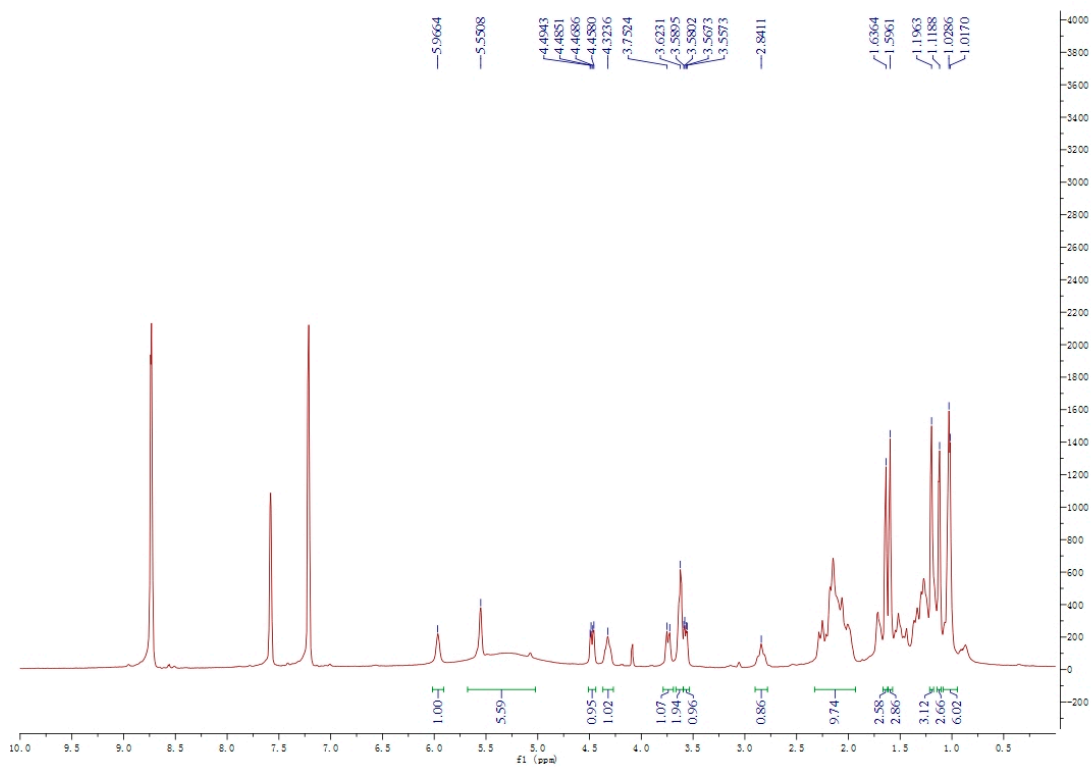Figure S40. <sup>1</sup>H-NMR of Compound 9 (400 MHz, C<sub>5</sub>D<sub>5</sub>N).

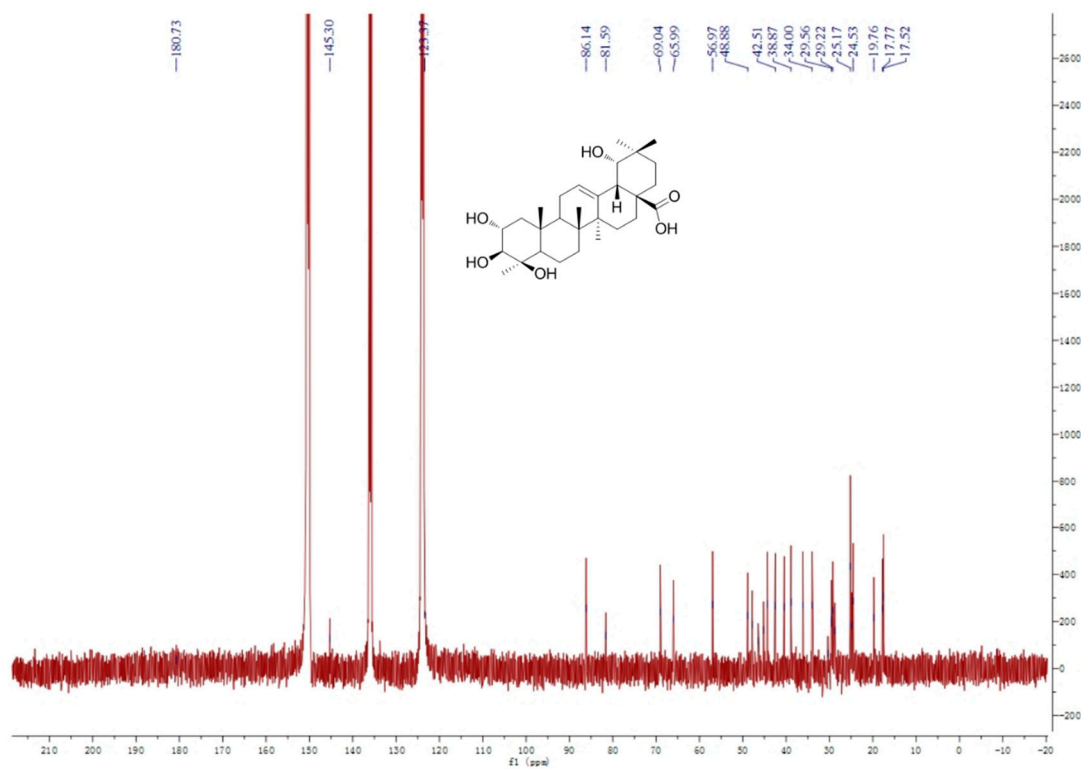

Figure S41.  $^{13}\text{C}$ -NMR of Compound 9 (101 MHz,  $\text{C}_5\text{D}_5\text{N}$ ).

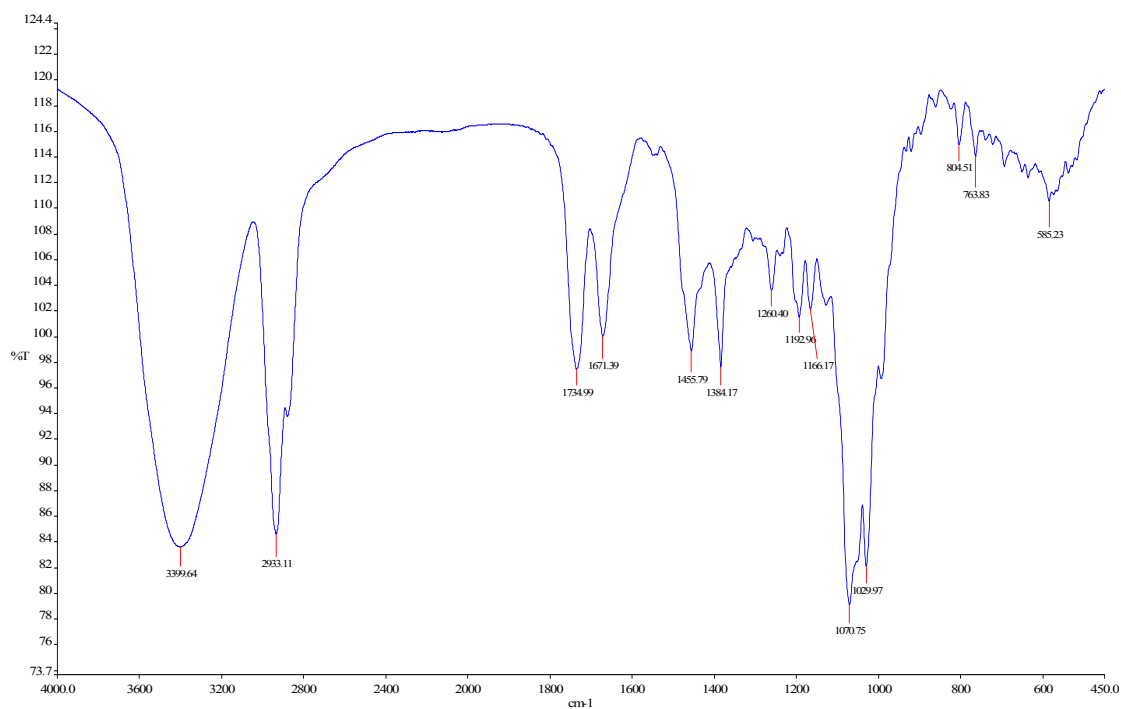

Figure S42. IR of Compound 10.

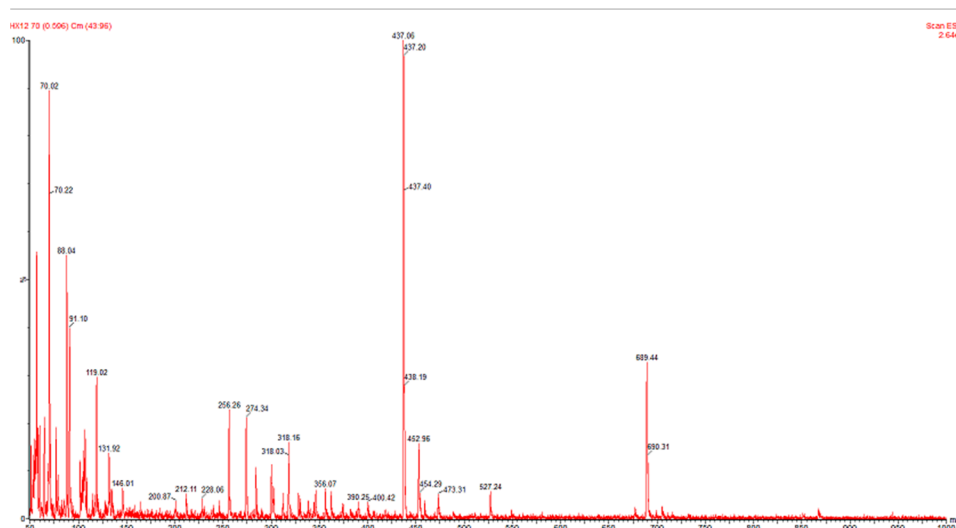

Figure S43. ES-MS of Compound 10.

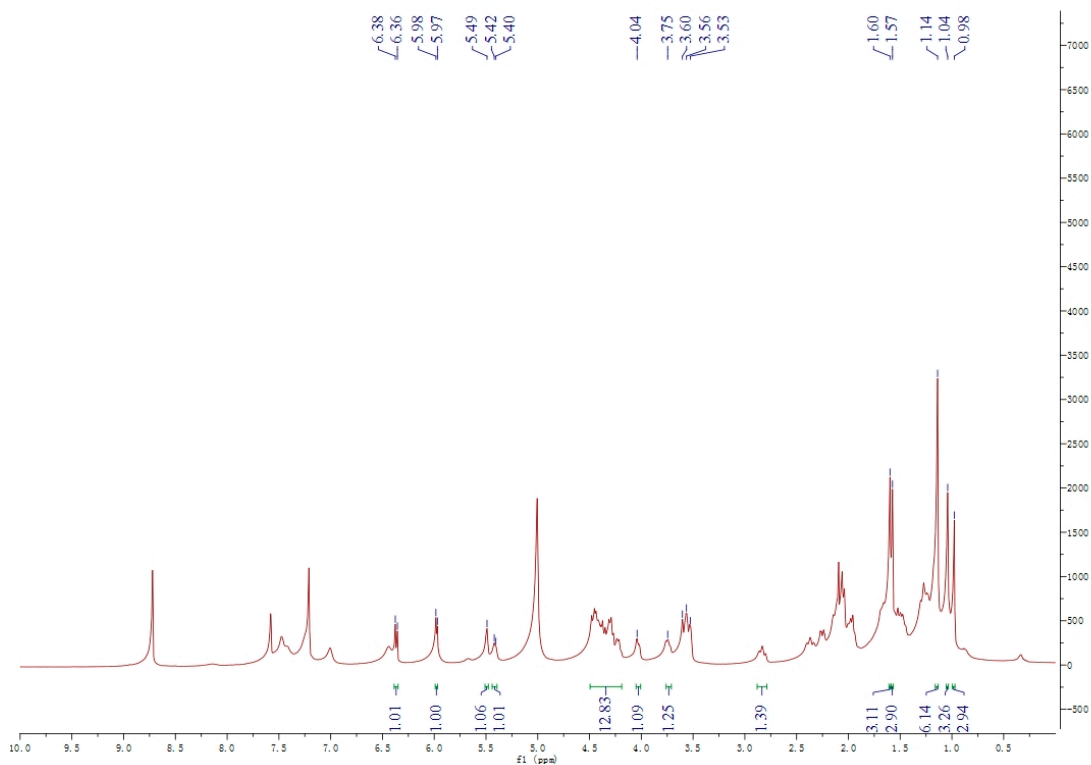Figure S44.  $^1\text{H-NMR}$  of Compound 10 (500 MHz,  $\text{C}_5\text{D}_5\text{N}$ ).

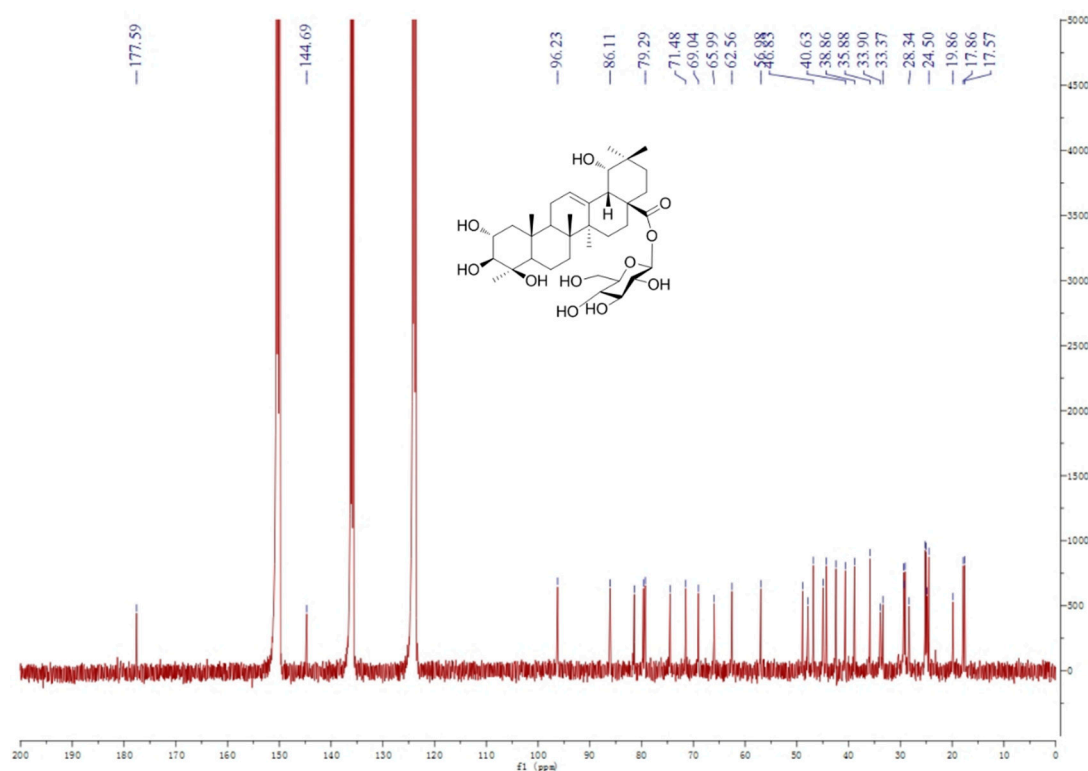

Figure S45.  $^{13}\text{C}$ -NMR of Compound 10 (126 MHz,  $\text{C}_5\text{D}_5\text{N}$ ).

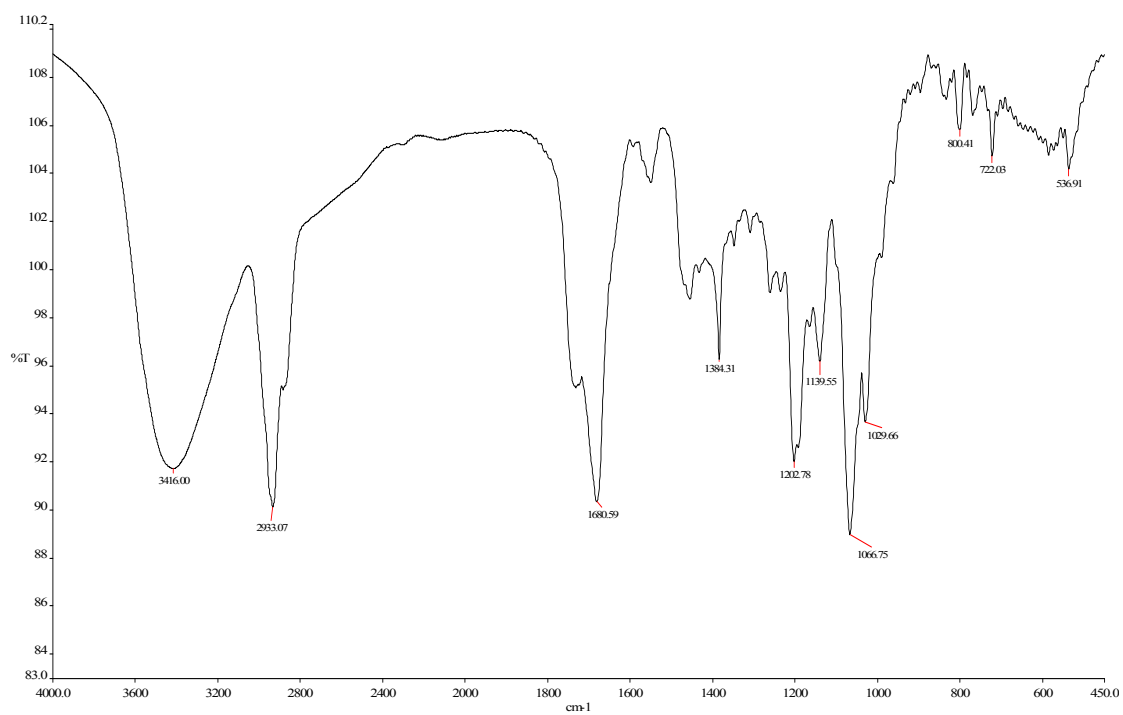

Figure S46. IR of Compound 11.



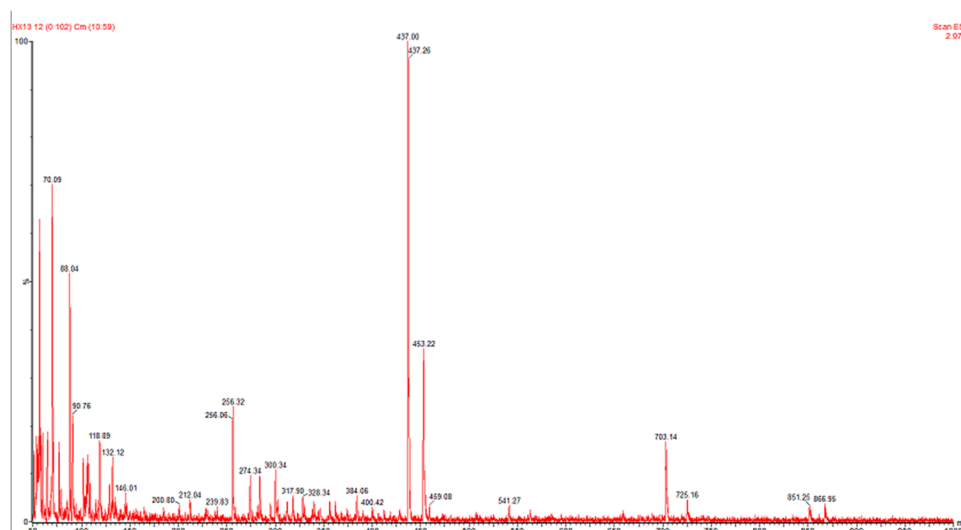

Figure S47. ES-MS of Compound 11.

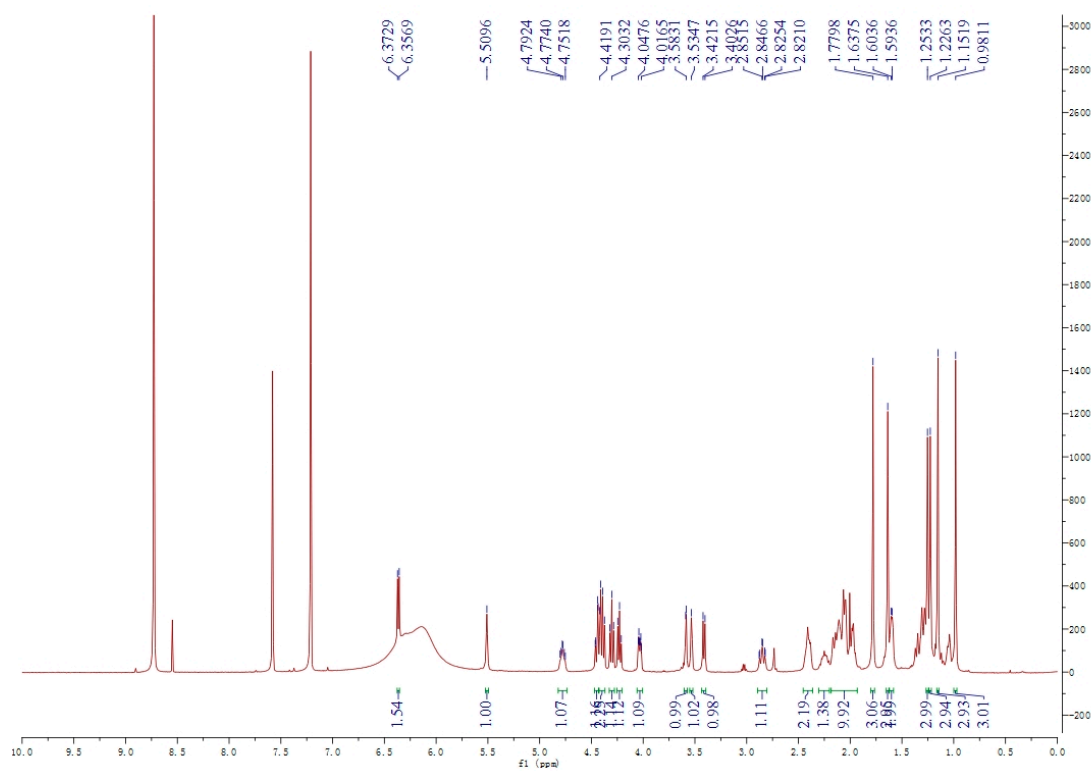Figure S48. <sup>1</sup>H-NMR of Compound 11 (500 MHz, C<sub>5</sub>D<sub>5</sub>N).

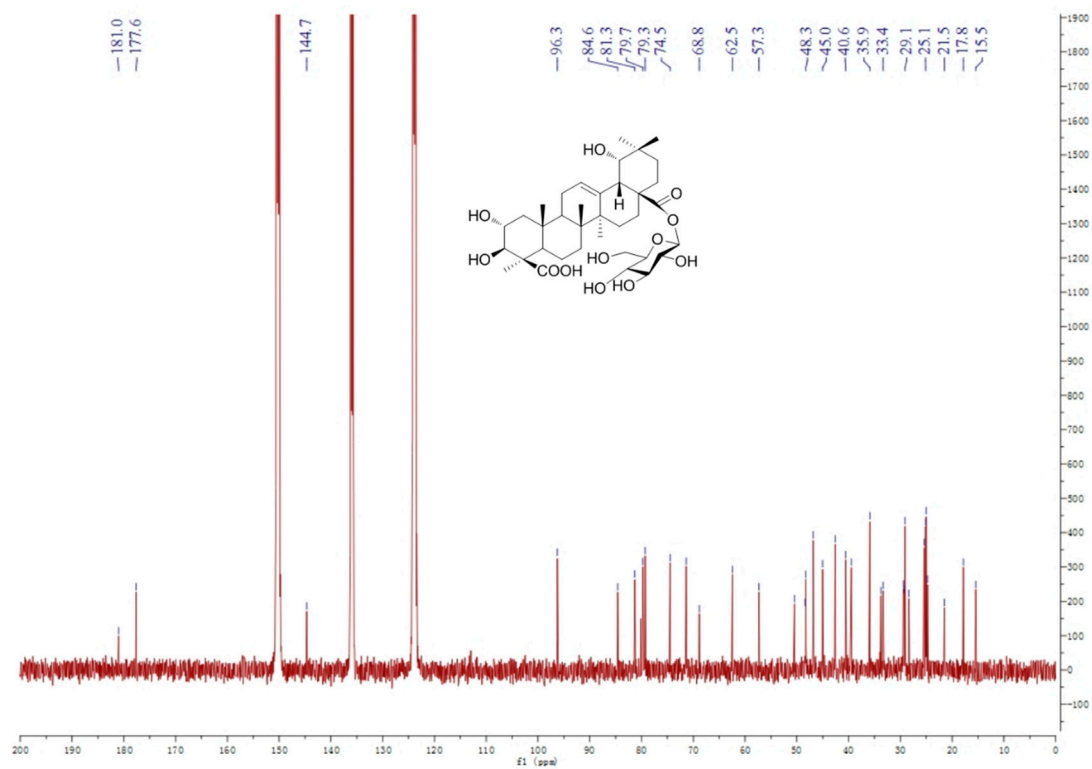

Figure S49.  $^{13}\text{C}$ -NMR of Compound 11 (126 MHz,  $\text{C}_5\text{D}_5\text{N}$ ).
